# Supplementary material for: Synthesis of pyrazolo[5,1-a]isoquinolines via silver(i)–rhodium(i) cooperative catalysis in the reaction of N′-(2-alkynylbenzylidene)hydrazide with cycloprop-2-ene-1,1-dicarboxylate
Source: Royal Society of Chemistry journal article supplement (doi:10.1039/c2ob26824h), 2012-01-01

**Synthesis of pyrazolo[5,1-*a*]isoquinolins via a  
silver(I)-rhodium(I) cooperative catalysis in the  
reaction of *N'*-(2-alkynylbenzylidene)hydrazide with  
cycloprop-2-ene-1,1-dicarboxylate**

Liangqing Yao,<sup>\*a</sup> Xingxin Yu,<sup>b</sup> Chen Mo,<sup>a</sup> and Jie Wu<sup>\*b</sup>

<sup>a</sup> *Obstetrics and Gynecology Hospital, Fudan University, 419 Fangxie Road, Shanghai 200011, China.*

<sup>b</sup> *Department of Chemistry, Fudan University, 220 Handan Road, Shanghai 200433, China.*

yaoliangqingcn@126.com; jie\_wu@fudan.edu.cn

## **Supporting Information**

1. General experimental methods (S2).
2. General experimental procedure and characterization data (S3-S7).
3. <sup>1</sup>H and <sup>13</sup>C NMR spectra of compound **3** (S8-S31).

### General experimental methods:

Unless otherwise stated, all commercial reagents were used as received. All solvents were dried and distilled according to standard procedures. Flash column chromatography was performed using silica gel (60-Å pore size, 32–63µm, standard grade). Analytical thin-layer chromatography was performed using glass plates pre-coated with 0.25 mm 230–400 mesh silica gel impregnated with a fluorescent indicator (254 nm). Thin layer chromatography plates were visualized by exposure to ultraviolet light. Organic solutions were concentrated on rotary evaporators at ~20 Torr at 25–35°C. Nuclear magnetic resonance (NMR) spectra are recorded in parts per million from internal tetramethylsilane on the  $\delta$  scale.  $^1\text{H}$  and  $^{13}\text{C}$  NMR spectra were recorded in  $\text{CDCl}_3$  on a Bruker DRX-400 spectrometer operating at 400 MHz and 100 MHz, respectively. All chemical shift values are quoted in ppm and coupling constants quoted in Hz. High resolution mass spectrometry (HRMS) spectra were obtained on a micrOTOF II Instrument.

### *General procedure for the synthesis of pyrazolo[5,1-a]isoquinolines via a tandem reaction of N'-(2-alkynylbenzylidene)hydrazides 1 with cycloprop-2-ene-1,1-dicarboxylate 2*

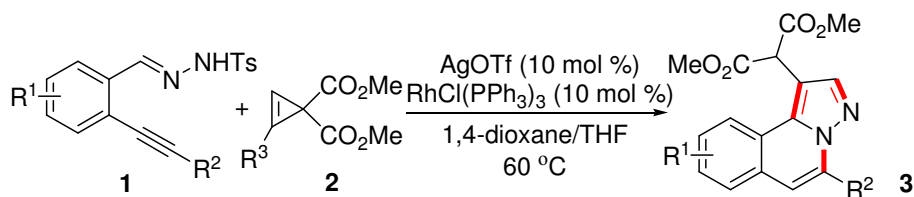

A mixture of *N'*-(2-alkynylbenzylidene)hydrazide **1** (0.5 mmol) and AgOTf (7.7mg, 10 mol %) in 1,4-dioxane (2.0 mL) was heated at 60 °C with vigorous stirring for 1 hour. Then, RhCl(PPh<sub>3</sub>)<sub>3</sub> (27.7mg, 10 mol %) and dimethyl cycloprop-2-ene-1,1-dicarboxylate **2** (0.36 mmol), and THF (2.0 mL) were added. The reaction mixture was stirred vigorously at 60 °C overnight until completion of the reaction. The reaction mixture was diluted with ethyl acetate (5.0 mL), and quenched with water (5.0 mL). The organic layer was washed with brine, dried over Na<sub>2</sub>SO<sub>4</sub>

and concentrated under reduced pressure. The residue was purified by flash column chromatography on silica gel to provide the desired product **3**.

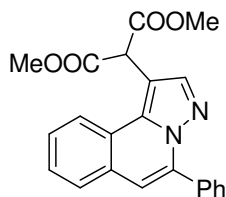

Dimethyl 2-(5-phenylpyrazolo[5,1-*a*]isoquinolin-1-yl)malonate **3a**. White solid; melting point: 118.2-119.9 °C; <sup>1</sup>H NMR (400 MHz, CDCl<sub>3</sub>): 3.81 (s, 6H), 5.47 (s, 1H), 7.05 (s, 1H), 7.50-7.58 (m, 5H), 7.76 (d, *J* = 6.9 Hz, 1H), 7.81 (d, *J* = 6.9 Hz, 2H), 8.11 (s, 1H), 8.22 (d, *J* = 7.3 Hz, 1H); <sup>13</sup>C NMR (100 MHz, CDCl<sub>3</sub>) δ 49.7, 53.2, 106.3, 113.3, 123.0, 124.2, 127.5, 127.7, 128.1, 128.4, 129.4, 129.5, 130.1, 133.7, 135.8, 138.7, 141.6, 168.5; HRMS calcd for C<sub>22</sub>H<sub>19</sub>N<sub>2</sub>O<sub>4</sub>: (M + H<sup>+</sup>) 375.1339, found: 375.1342.

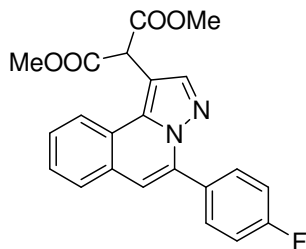

Dimethyl 2-(5-(4-fluorophenyl)pyrazolo[5,1-*a*]isoquinolin-1-yl)malonate **3b**. White solid; melting point: 135.1-136.4 °C; <sup>1</sup>H NMR (400 MHz, CDCl<sub>3</sub>): 3.81 (s, 6H), 5.47 (s, 1H), 7.02 (s, 1H), 7.20 (t, *J* = 8.2 Hz, 2H), 7.57-7.62 (m, 2H), 7.75 (d, *J* = 7.3 Hz, 1H), 7.81-7.84 (m, 2H), 8.11 (s, 1H), 8.22 (d, *J* = 7.3 Hz, 1H); <sup>13</sup>C NMR (100 MHz, CDCl<sub>3</sub>) δ 49.7, 53.2, 106.4, 113.2, 115.5 (d, <sup>2</sup>*J*<sub>CF</sub> = 22 Hz), 123.0, 124.2, 127.7, 128.2, 129.7, 130.0, 131.6 (d, <sup>3</sup>*J*<sub>CF</sub> = 9 Hz), 135.8, 137.6, 141.7, 163.4 (d, <sup>1</sup>*J*<sub>CF</sub> = 248 Hz), 168.4; HRMS calcd for C<sub>22</sub>H<sub>18</sub>FN<sub>2</sub>O<sub>4</sub>: (M + H<sup>+</sup>) 393.1245, found: 393.1243.

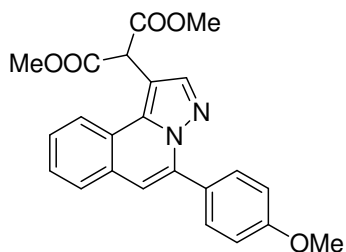

Dimethyl 2-(5-(4-methoxyphenyl)pyrazolo[5,1-*a*]isoquinolin-1-yl)malonate **3c**. White solid; melting point: 142.6-143.3 °C; <sup>1</sup>H NMR (400 MHz, CDCl<sub>3</sub>): 3.80 (s, 6H), 3.84 (s, 3H), 5.47 (s, 1H), 6.98-7.02 (m, 3H), 7.49-7.56 (m, 2H), 7.70 (d, *J* = 6.9 Hz, 1H), 7.76 (d, *J* = 7.8 Hz, 2H), 8.12 (s, 1H), 8.19 (d, *J* = 7.3 Hz, 1H); <sup>13</sup>C NMR (100 MHz, CDCl<sub>3</sub>) δ 49.7, 53.2, 55.4, 106.2, 112.6, 113.8, 122.9, 123.9, 126.0, 127.3, 127.5, 128.0, 130.2, 130.9, 135.8, 138.4, 141.5, 160.4, 168.5; HRMS calcd for C<sub>23</sub>H<sub>21</sub>N<sub>2</sub>O<sub>5</sub>: (M + H<sup>+</sup>) 405.1445, found: 405.1433.

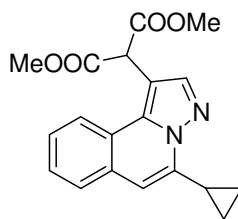

Dimethyl 2-(5-cyclopropylpyrazolo[5,1-*a*]isoquinolin-1-yl)malonate **3d**. Colourless oil; <sup>1</sup>H NMR (400 MHz, CDCl<sub>3</sub>): 0.87-0.90 (m, 2H), 1.15-1.20 (m, 2H), 2.64-2.69 (m, 1H), 3.80 (s, 6H), 5.46 (s, 1H), 6.68 (s, 1H), 7.50-7.52 (m, 2H), 7.64-7.66 (m, 1H), 8.16-8.18 (m, 2H); <sup>13</sup>C NMR (100 MHz, CDCl<sub>3</sub>) δ 7.0, 11.5, 49.7, 53.1, 106.2, 107.6, 122.8, 123.4, 126.8, 127.0, 127.8, 130.1, 135.3, 140.9, 141.4, 168.5; HRMS calcd for C<sub>19</sub>H<sub>19</sub>N<sub>2</sub>O<sub>4</sub>: (M + H<sup>+</sup>) 339.1339, found: 339.1332.

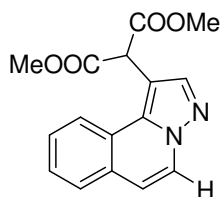

Dimethyl 2-(pyrazolo[5,1-*a*]isoquinolin-1-yl)malonate **3e**. White solid; melting point: 103.8-105.1 °C; <sup>1</sup>H NMR (400 MHz, CDCl<sub>3</sub>): 3.81 (s, 6H), 5.42 (s, 1H), 6.99 (d, *J* = 7.3 Hz, 1H), 7.55-7.61 (m, 2H), 7.72 (d, *J* = 7.3 Hz, 1H), 8.12 (s, 1H), 8.17-8.23 (m, 2H); <sup>13</sup>C NMR (100 MHz, CDCl<sub>3</sub>) δ 49.6, 53.2, 105.9, 112.7, 123.2, 124.7, 126.7,

127.7, 127.8, 128.0, 129.8, 134.9, 142.0, 168.4; HRMS calcd for C<sub>16</sub>H<sub>15</sub>N<sub>2</sub>O<sub>4</sub>: (M + H<sup>+</sup>) 299.1026, found: 299.1025.

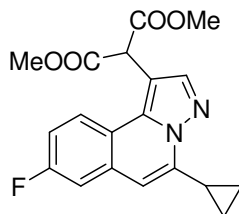

Dimethyl 2-(5-cyclopropyl-8-fluoropyrazolo[5,1-*a*]isoquinolin-1-yl)malonate **3f**.

White solid; melting point: 88.5-89.5 °C; <sup>1</sup>H NMR (400 MHz, CDCl<sub>3</sub>): 0.88-0.92 (m, 2H), 1.17-1.22 (m, 2H), 2.65-2.70 (m, 1H), 3.81 (s, 6H), 5.37 (s, 1H), 6.60 (s, 1H), 7.24-7.30 (m, 2H), 8.16-8.18 (m, 2H); <sup>13</sup>C NMR (100 MHz, CDCl<sub>3</sub>) δ 7.2, 11.5, 49.6, 53.2, 105.8, 106.8, 111.8 (d, <sup>2</sup>J<sub>CF</sub> = 21 Hz), 115.3 (d, <sup>2</sup>J<sub>CF</sub> = 23 Hz), 120.1, 125.3 (d, <sup>3</sup>J<sub>CF</sub> = 9 Hz), 132.1 (d, <sup>3</sup>J<sub>CF</sub> = 9 Hz), 135.1, 141.7, 142.2, 161.8 (d, <sup>1</sup>J<sub>CF</sub> = 247 Hz), 168.4; HRMS calcd for C<sub>19</sub>H<sub>18</sub>FN<sub>2</sub>O<sub>4</sub>: (M + H<sup>+</sup>) 357.1245, found: 357.1237.

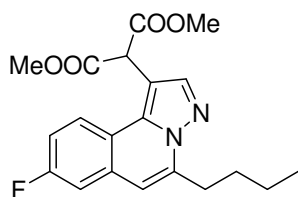

Dimethyl 2-(5-butyl-8-fluoropyrazolo[5,1-*a*]isoquinolin-1-yl)malonate **3g**. White

solid; melting point: 69.9-71.3 °C; <sup>1</sup>H NMR (400 MHz, CDCl<sub>3</sub>): 0.97-1.01 (m, 3H), 1.48-1.53 (m, 2H), 1.77-1.89 (m, 2H), 3.13-3.17 (m, 2H), 3.81 (s, 6H), 5.37 (s, 1H), 6.78 (s, 1H), 7.23-7.33 (m, 2H), 8.14-8.19 (m, 2H); <sup>13</sup>C NMR (100 MHz, CDCl<sub>3</sub>) δ 13.9, 22.6, 28.9, 30.8, 49.7, 53.2, 105.6, 109.5, 111.7 (d, <sup>2</sup>J<sub>CF</sub> = 22 Hz), 115.2 (d, <sup>2</sup>J<sub>CF</sub> = 23 Hz), 120.3, 125.3 (d, <sup>3</sup>J<sub>CF</sub> = 9 Hz), 132.1 (d, <sup>3</sup>J<sub>CF</sub> = 9 Hz), 135.1, 140.9, 141.5, 161.8 (d, <sup>1</sup>J<sub>CF</sub> = 247 Hz), 168.4; HRMS calcd for C<sub>20</sub>H<sub>22</sub>FN<sub>2</sub>O<sub>4</sub>: (M + H<sup>+</sup>) 373.1558, found: 373.1545.

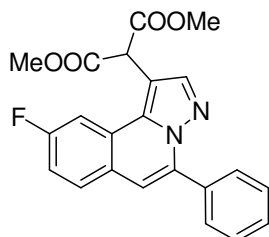

Dimethyl 2-(9-fluoro-5-phenylpyrazolo[5,1-*a*]isoquinolin-1-yl)malonate **3h**. White solid; melting point: 129.3-130.3 °C; <sup>1</sup>H NMR (400 MHz, CDCl<sub>3</sub>): 3.83 (s, 6H), 5.38 (s, 1H), 7.02 (s, 1H), 7.29-7.33 (m, 1H), 7.46-7.53 (m, 3H), 7.72-7.81 (m, 3H), 7.89-7.91 (m, 1H), 8.14 (s, 1H); <sup>13</sup>C NMR (100 MHz, CDCl<sub>3</sub>) δ 49.5, 53.3, 106.8, 108.8 (d, <sup>2</sup>J<sub>CF</sub> = 24 Hz), 112.6, 116.8 (d, <sup>2</sup>J<sub>CF</sub> = 24 Hz), 125.2 (d, <sup>3</sup>J<sub>CF</sub> = 10 Hz), 126.7, 128.5, 129.5, 129.8 (d, <sup>3</sup>J<sub>CF</sub> = 9 Hz), 133.5, 135.1, 135.2, 138.1, 141.8, 161.6 (d, <sup>1</sup>J<sub>CF</sub> = 247 Hz), 168.3; HRMS calcd for C<sub>22</sub>H<sub>18</sub>FN<sub>2</sub>O<sub>4</sub>: (M + H<sup>+</sup>) 393.1245, found: 393.1233.

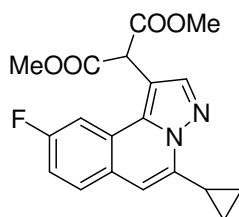

Dimethyl 2-(5-cyclopropyl-9-fluoropyrazolo[5,1-*a*]isoquinolin-1-yl)malonate **3i**. White solid; melting point: 120.9-122.1 °C; <sup>1</sup>H NMR (400 MHz, CDCl<sub>3</sub>): 0.86-0.91 (m, 2H), 1.16-1.21 (m, 2H), 2.61-2.68 (m, 1H), 3.82 (s, 6H), 5.36 (s, 1H), 6.67 (s, 1H), 7.24-7.28 (m, 1H), 7.62-7.66 (m, 1H), 7.84-7.86 (m, 1H), 8.20 (s, 1H); <sup>13</sup>C NMR (100 MHz, CDCl<sub>3</sub>) δ 6.9, 11.5, 49.4, 53.2, 106.6, 107.2, 108.6 (d, <sup>2</sup>J<sub>CF</sub> = 24 Hz), 116.5 (d, <sup>2</sup>J<sub>CF</sub> = 23 Hz), 124.3 (d, <sup>3</sup>J<sub>CF</sub> = 9 Hz), 126.6, 129.1 (d, <sup>3</sup>J<sub>CF</sub> = 9 Hz), 134.7, 140.3, 141.5, 161.2 (d, <sup>1</sup>J<sub>CF</sub> = 245 Hz), 168.3; HRMS calcd for C<sub>19</sub>H<sub>18</sub>FN<sub>2</sub>O<sub>4</sub>: (M + H<sup>+</sup>) 357.1245, found: 357.1231.

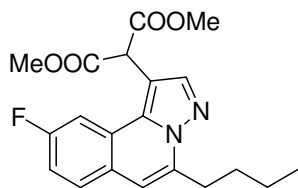

Dimethyl 2-(5-butyl-9-fluoropyrazolo[5,1-*a*]isoquinolin-1-yl)malonate **3j**. White solid; melting point: 106.1-107.5 °C; <sup>1</sup>H NMR (400 MHz, CDCl<sub>3</sub>): 0.98-1.01 (m, 3H), 1.48-1.53 (m, 2H), 1.81-1.87 (m, 2H), 3.13-3.17 (m, 2H), 3.82 (s, 6H), 5.36 (s, 1H), 6.83 (s, 1H), 7.26-7.30 (m, 1H), 7.65-7.69 (m, 1H), 7.83-7.86 (m, 1H), 8.15 (s, 1H); <sup>13</sup>C NMR (100 MHz, CDCl<sub>3</sub>) δ 14.0, 22.6, 28.9, 30.7, 49.4, 53.2, 106.5, 108.5 (d, <sup>2</sup>J<sub>CF</sub> = 24 Hz), 109.6, 116.5 (d, <sup>2</sup>J<sub>CF</sub> = 23 Hz), 124.6 (d, <sup>3</sup>J<sub>CF</sub> = 9 Hz), 126.6, 129.0 (d, <sup>3</sup>J<sub>CF</sub> = 9 Hz), 134.7, 140.3, 141.5, 161.2 (d, <sup>1</sup>J<sub>CF</sub> = 245 Hz), 168.3; HRMS calcd for C<sub>22</sub>H<sub>22</sub>FN<sub>2</sub>O<sub>4</sub>: (M + H<sup>+</sup>) 401.1545, found: 401.1531.

$J_{CF} = 9$  Hz), 134.7, 139.0, 141.3, 161.1 (d,  $^1J_{CF} = 245$  Hz), 168.3; HRMS calcd for  $C_{20}H_{22}FN_2O_4$ : (M + H<sup>+</sup>) 373.1558, found: 373.1576.

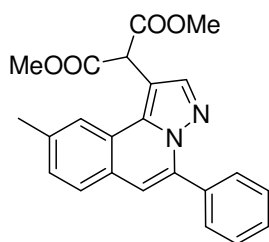

Dimethyl 2-(9-methyl-5-phenylpyrazolo[5,1-a]isoquinolin-1-yl)malonate **3k**.  
Colorless oil;  $^1H$  NMR (400 MHz,  $CDCl_3$ ): 2.55 (s, 3H), 3.81 (s, 6H), 5.49 (s, 1H), 7.00 (s, 1H), 7.38 (d,  $J = 7.8$  Hz, 1H), 7.48-7.50 (m, 3H), 7.63 (d,  $J = 8.3$  Hz, 1H), 7.81 (d,  $J = 6.9$  Hz, 2H), 8.00 (s, 1H), 8.09 (s, 1H);  $^{13}C$  NMR (100 MHz,  $CDCl_3$ )  $\delta$  22.1, 49.9, 53.1, 106.1, 113.2, 122.8, 124.3, 127.5, 127.9, 128.4, 129.3, 129.5, 129.6, 133.9, 135.6, 137.5, 137.9, 141.5, 168.5; HRMS calcd for  $C_{23}H_{21}N_2O_4$ : (M + H<sup>+</sup>) 389.1496, found: 389.1490.

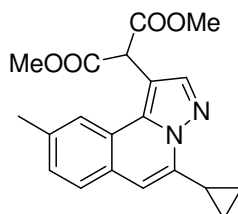

Dimethyl 2-(5-cyclopropyl-9-methylpyrazolo[5,1-a]isoquinolin-1-yl)malonate **3l**.  
White solid; melting point: 125.0-126.6 °C;  $^1H$  NMR (400 MHz,  $CDCl_3$ ): 0.86-0.90 (m, 2H), 1.13-1.19 (m, 2H), 2.60-2.68 (m, 1H), 3.77 (s, 3H), 3.81 (s, 6H), 5.47 (s, 1H), 6.65 (s, 1H), 7.33 (d,  $J = 7.8$  Hz, 1H), 7.54 (d,  $J = 7.8$  Hz, 1H), 7.95 (s, 1H), 8.16 (s, 1H);  $^{13}C$  NMR (100 MHz,  $CDCl_3$ )  $\delta$  6.8, 11.5, 22.0, 49.8, 53.1, 106.0, 107.6, 122.7, 123.6, 126.9, 127.8, 129.4, 135.2, 136.7, 140.0, 141.2, 168.6; HRMS calcd for  $C_{20}H_{21}N_2O_4$ : (M + H<sup>+</sup>) 353.1496, found: 353.1487.

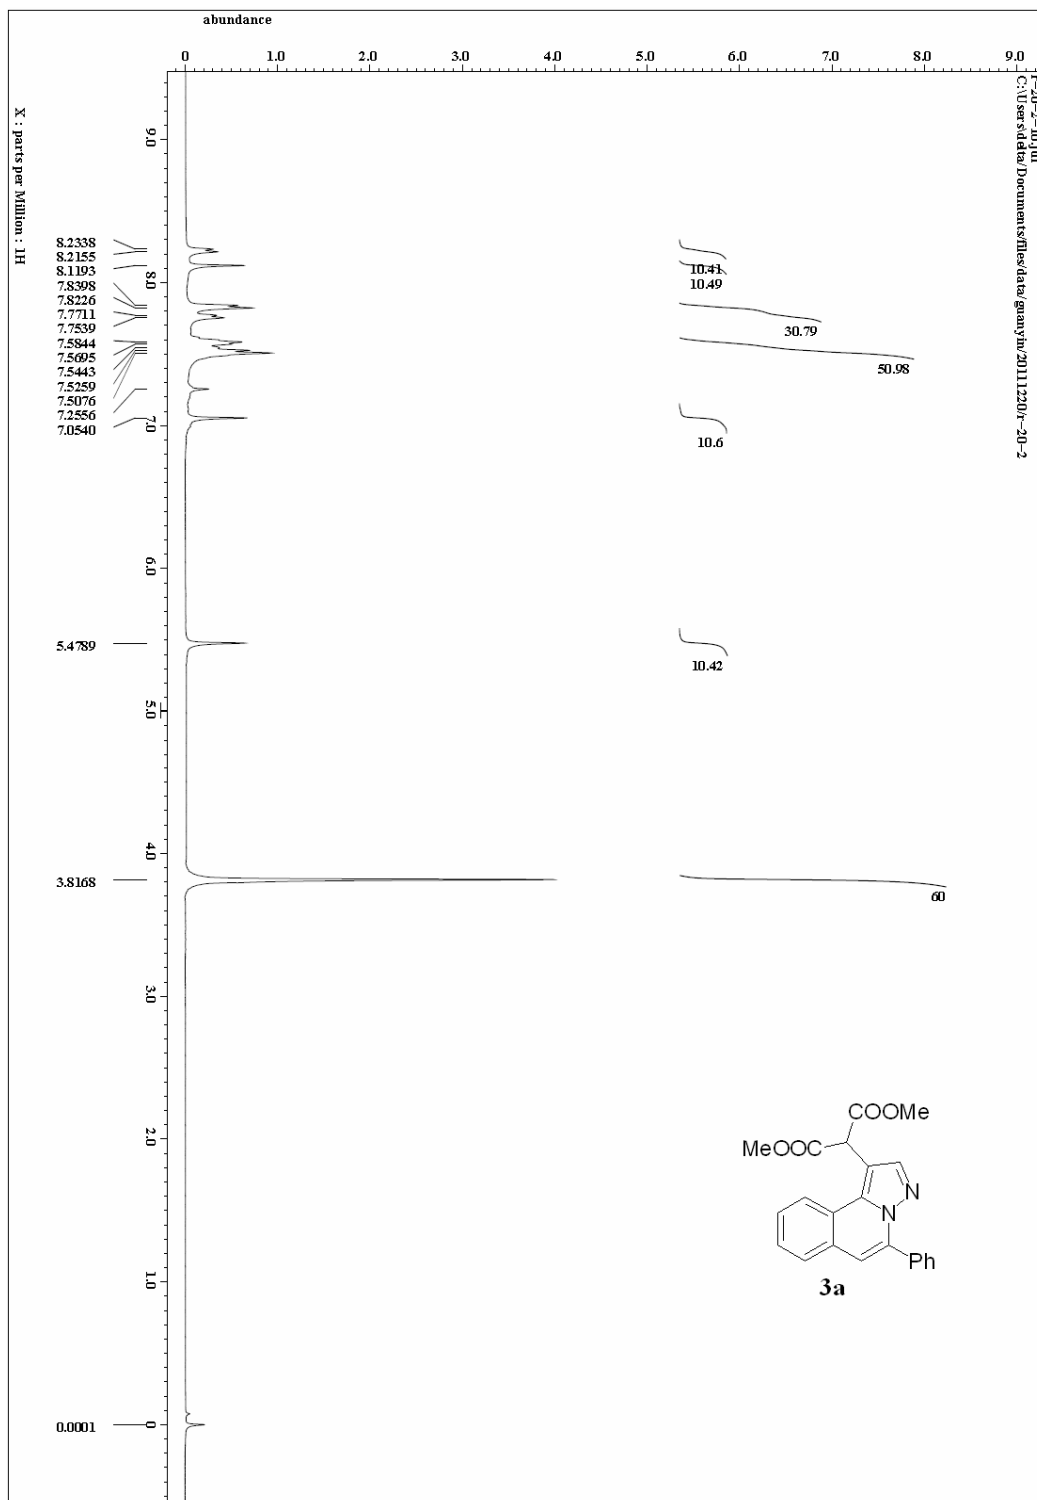



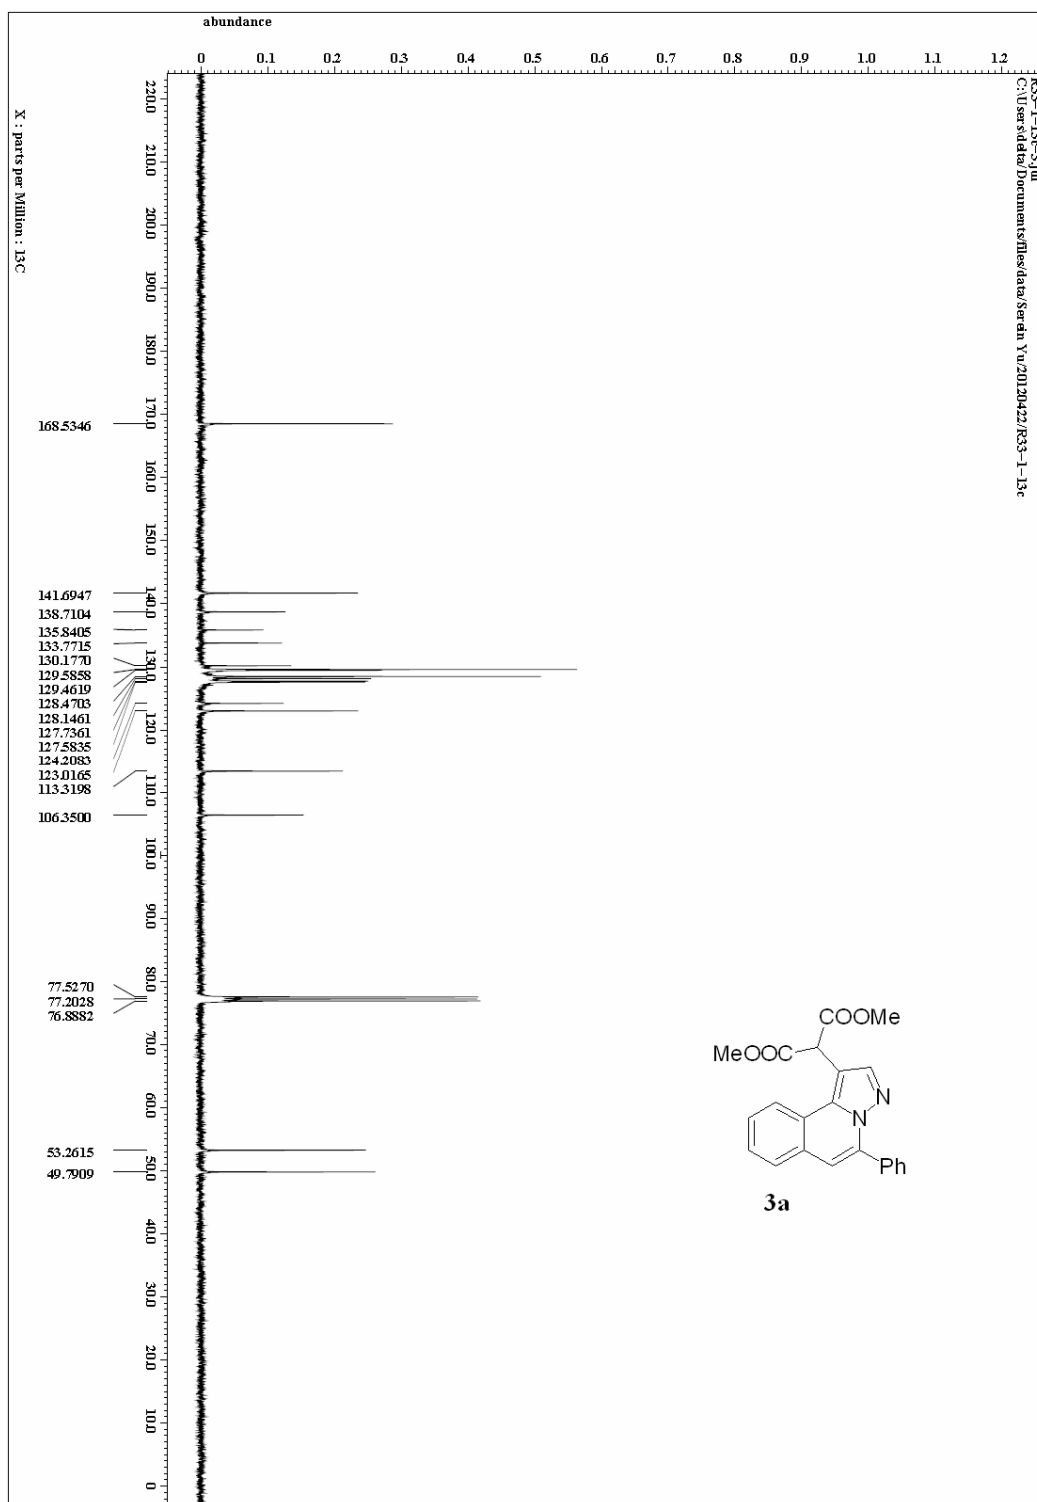

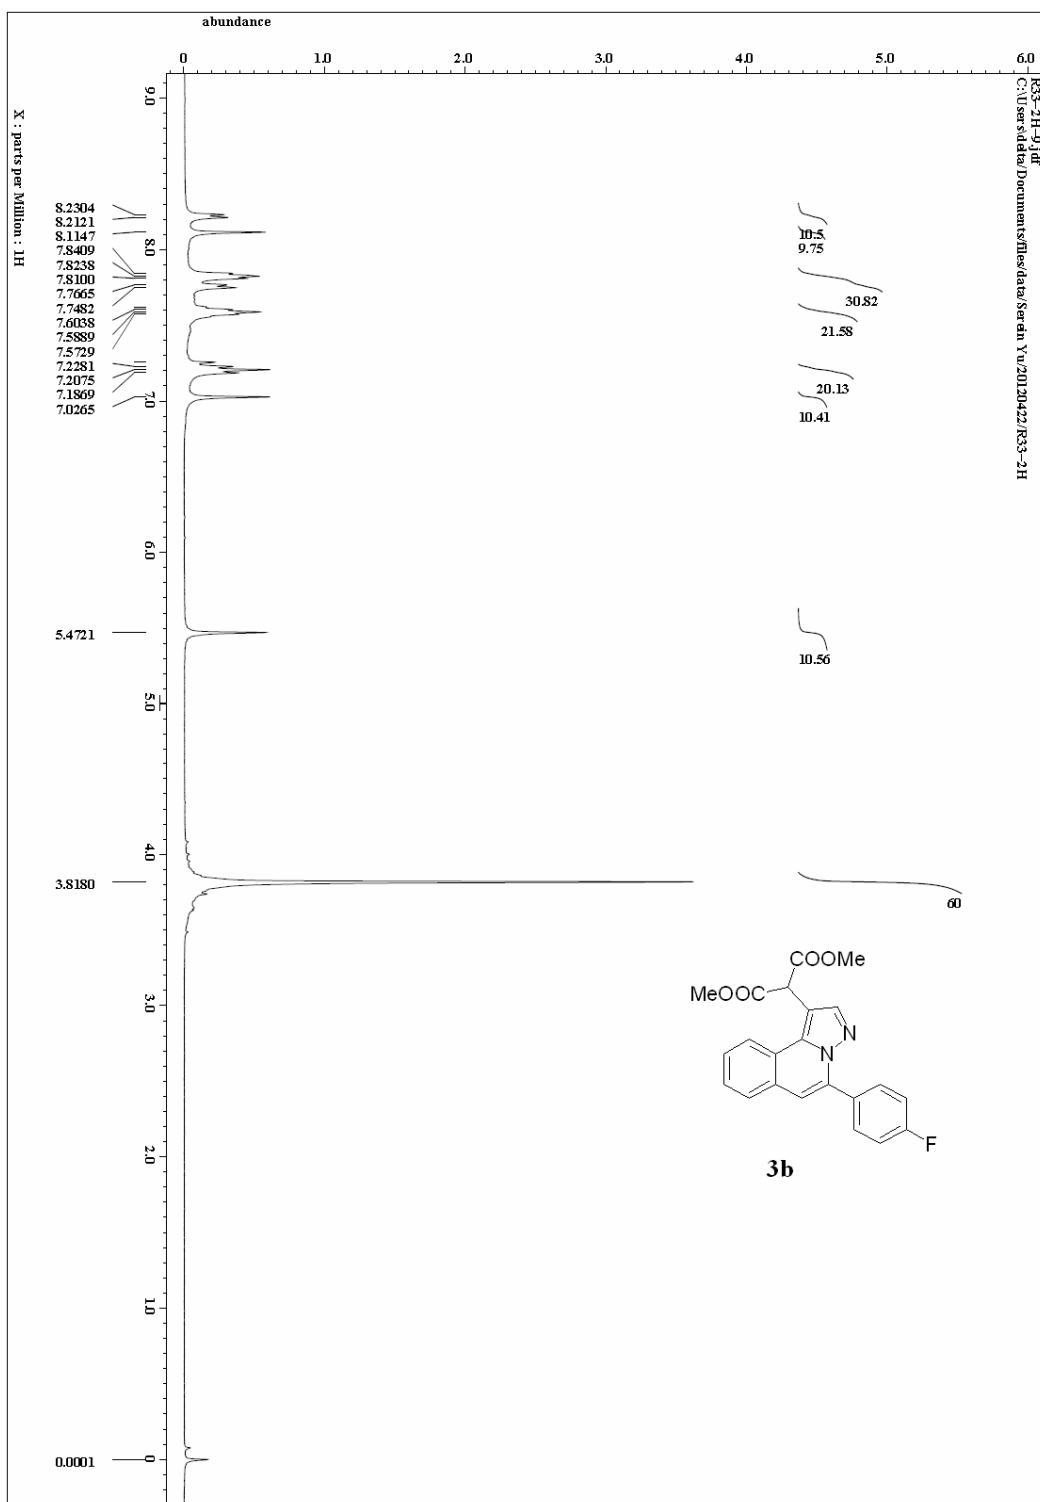

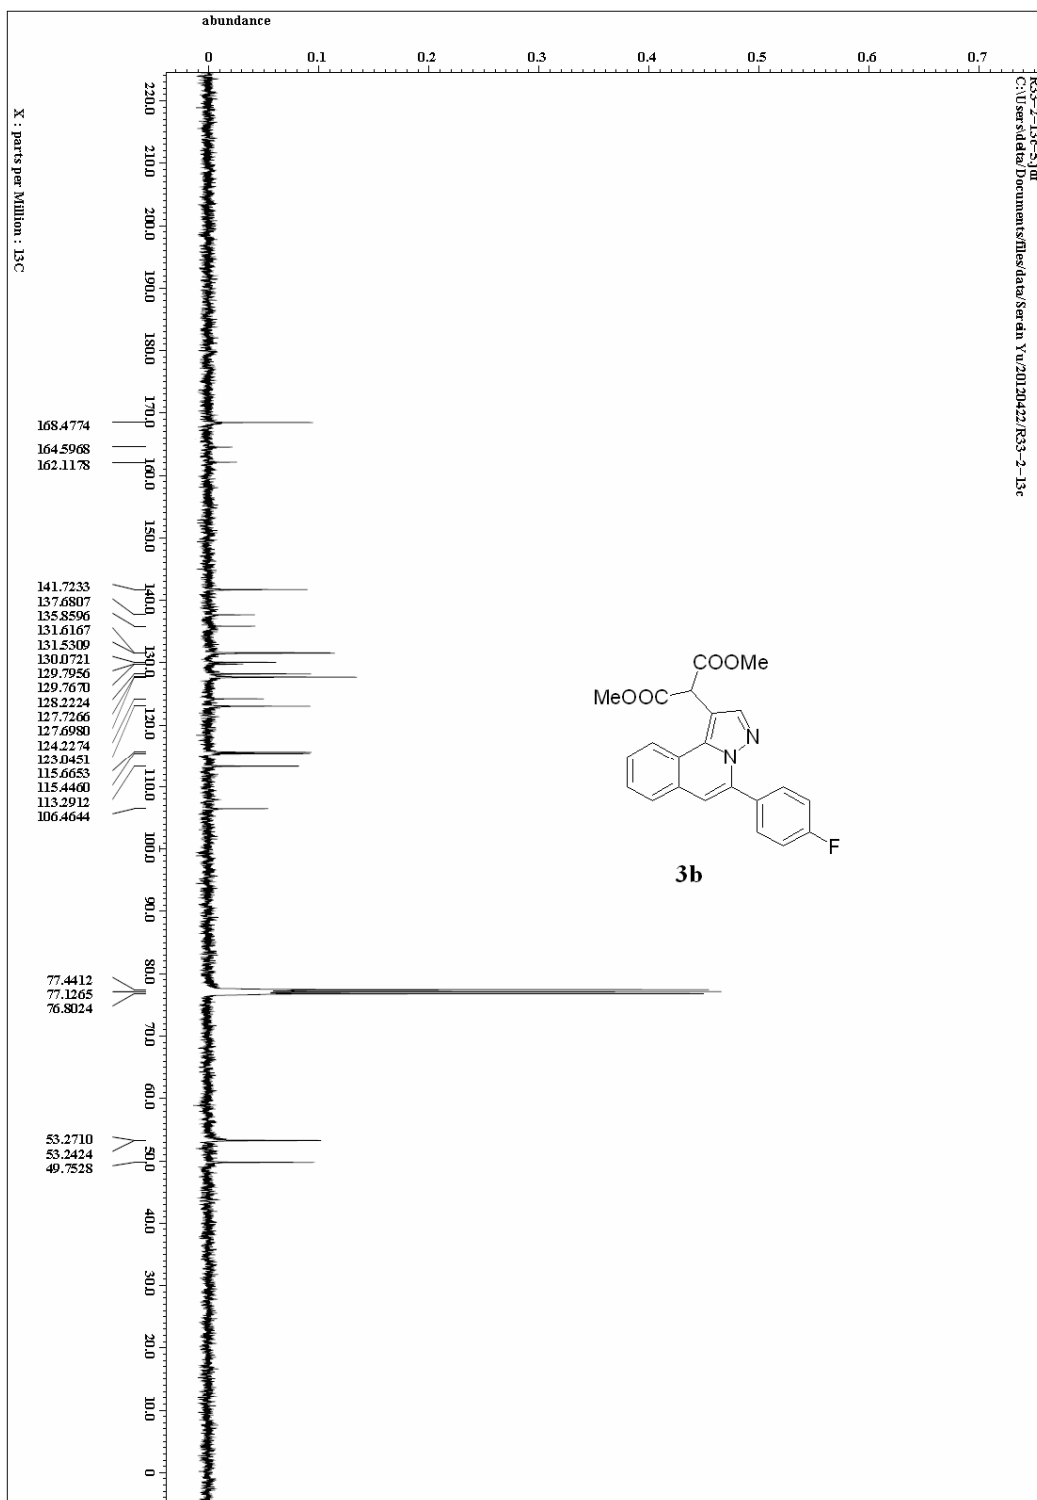

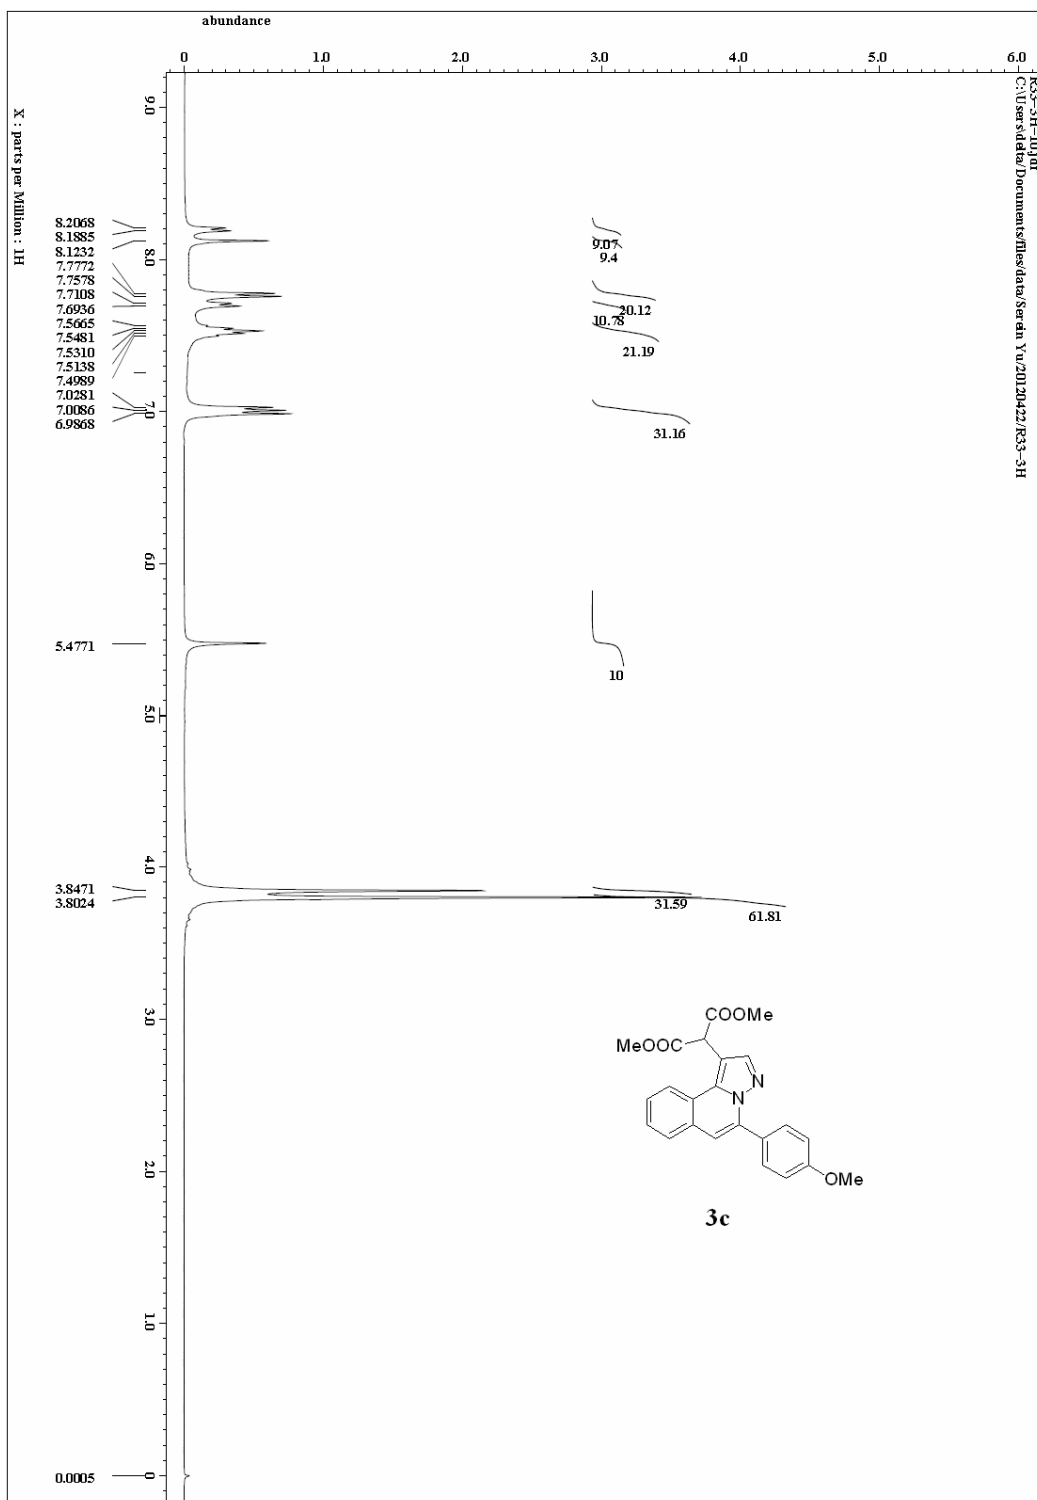

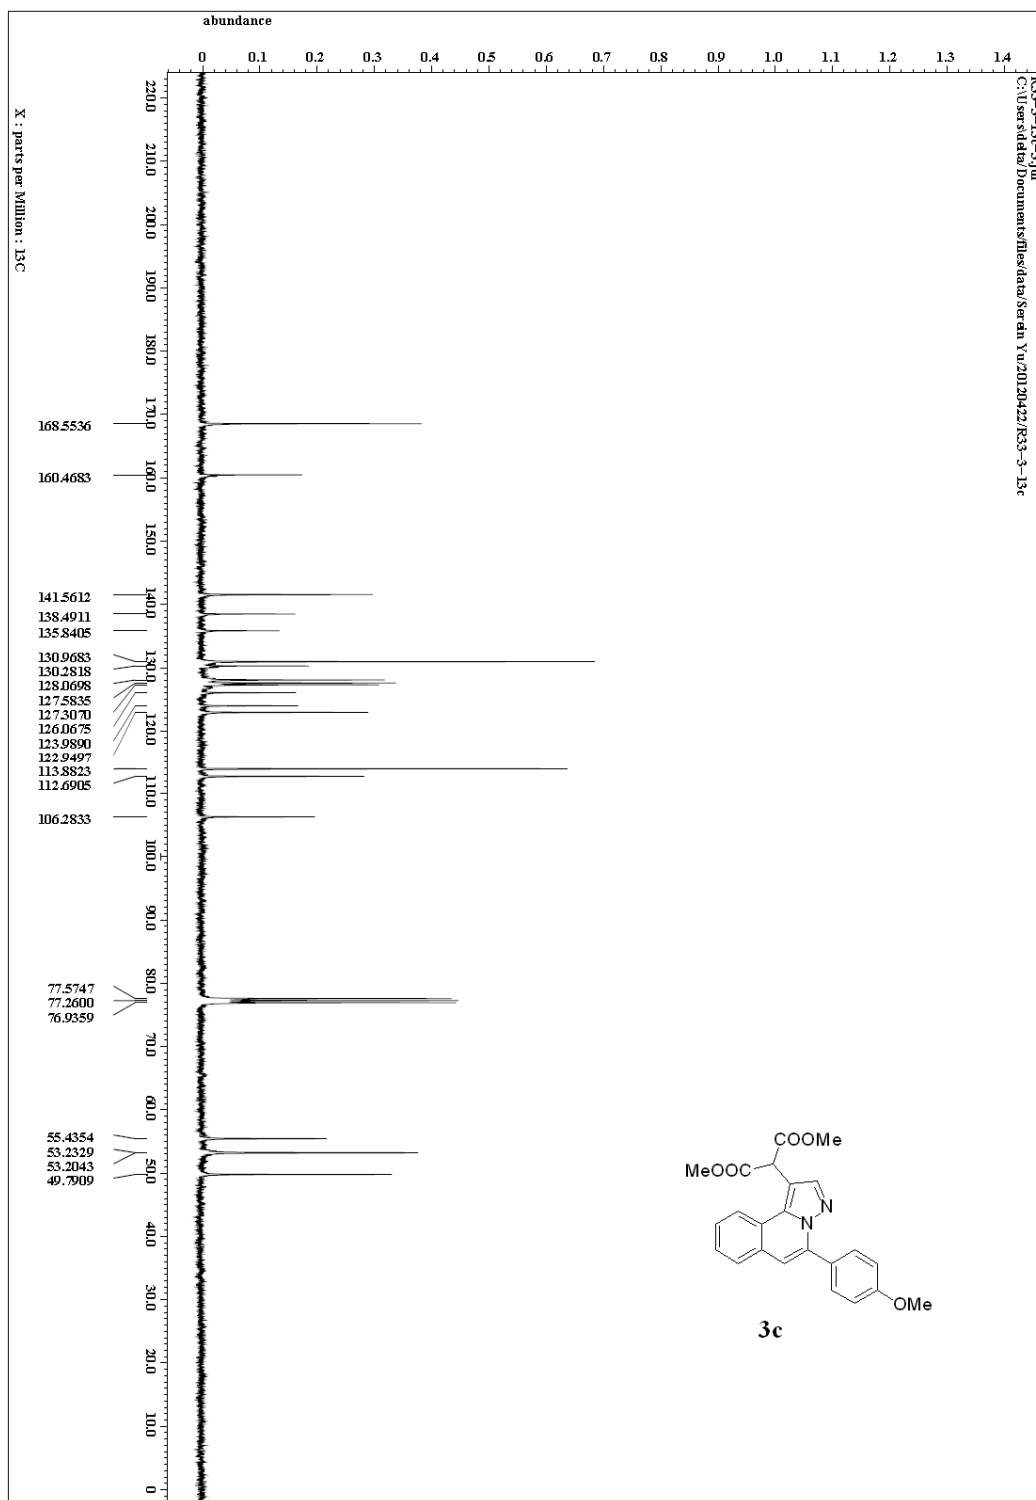

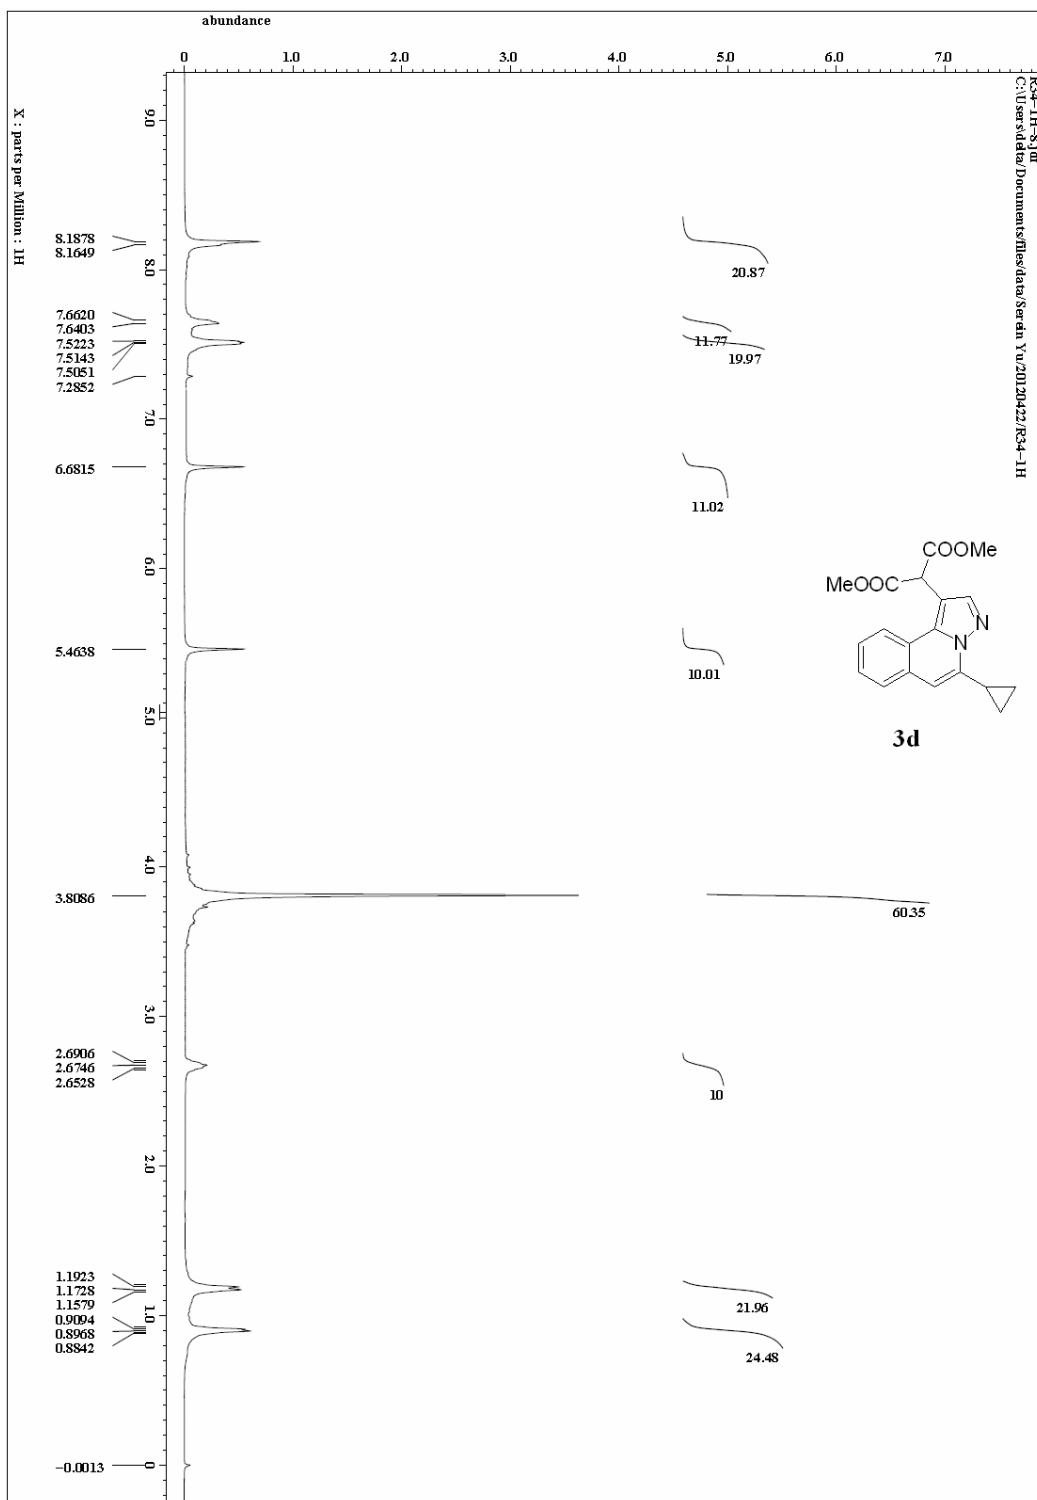

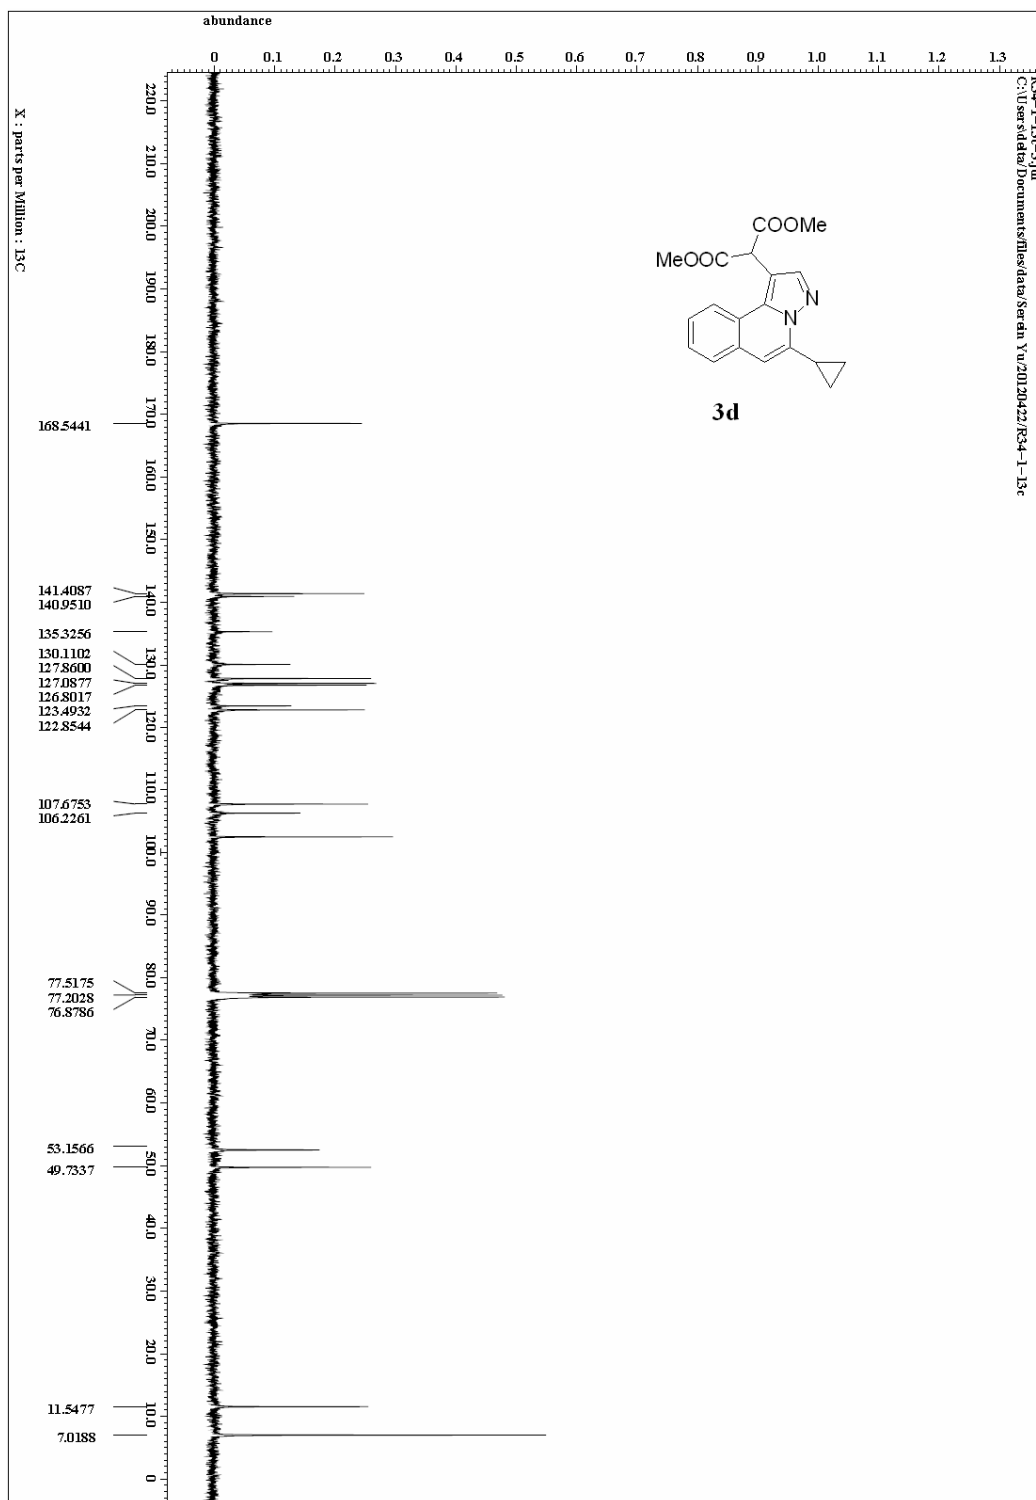

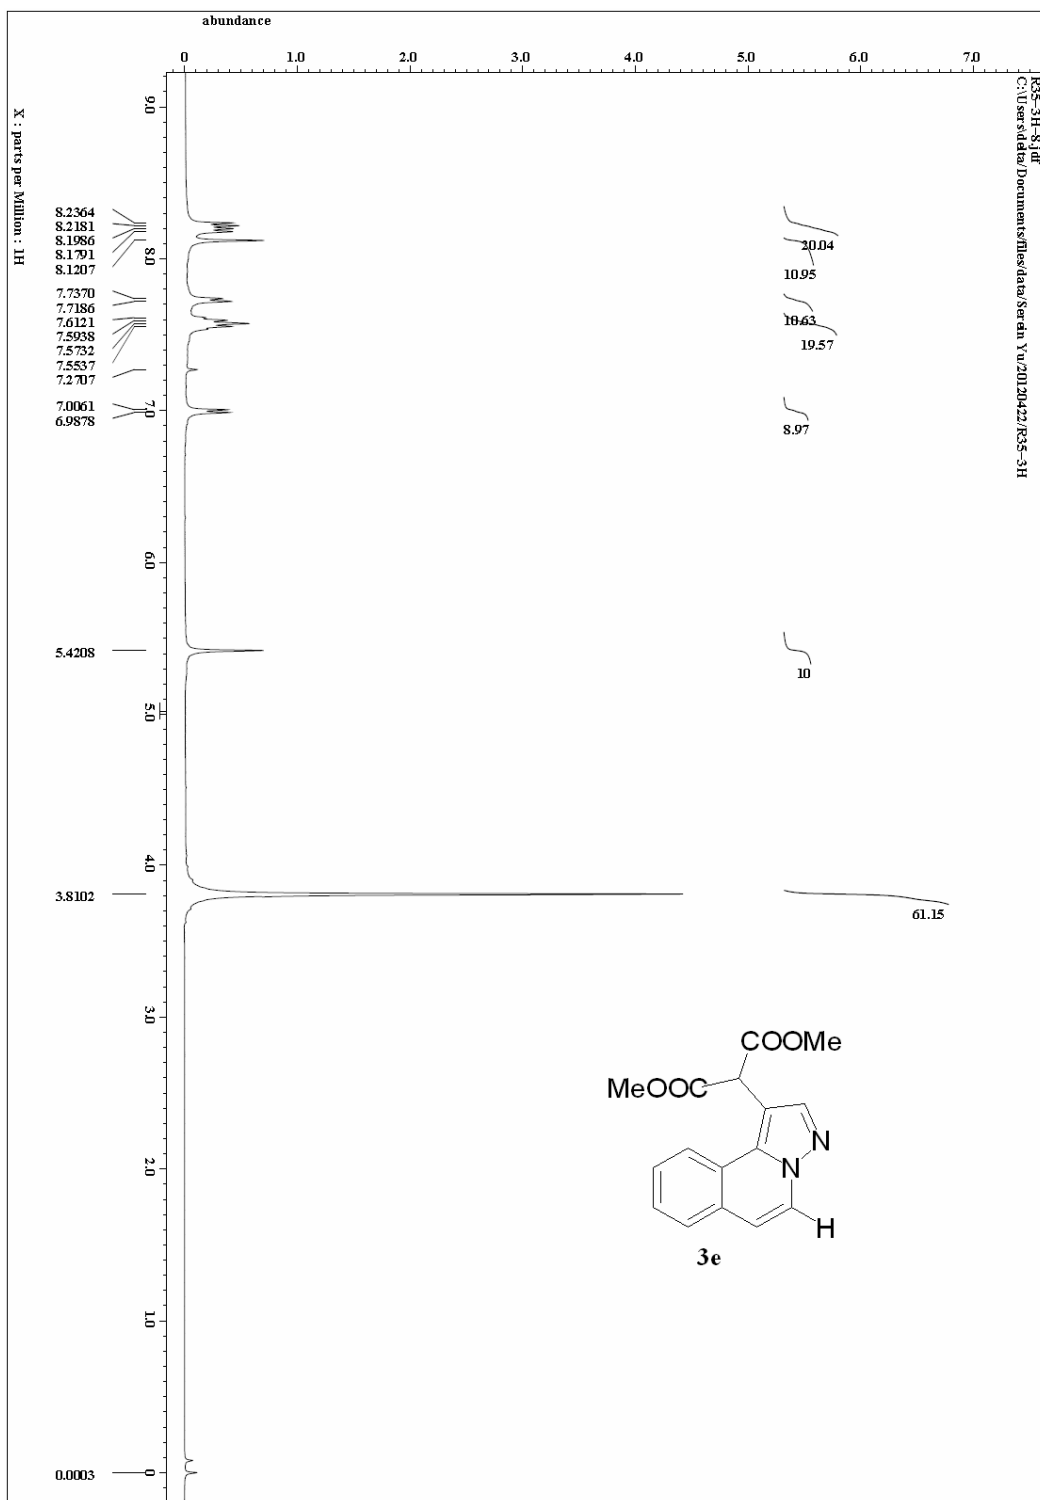



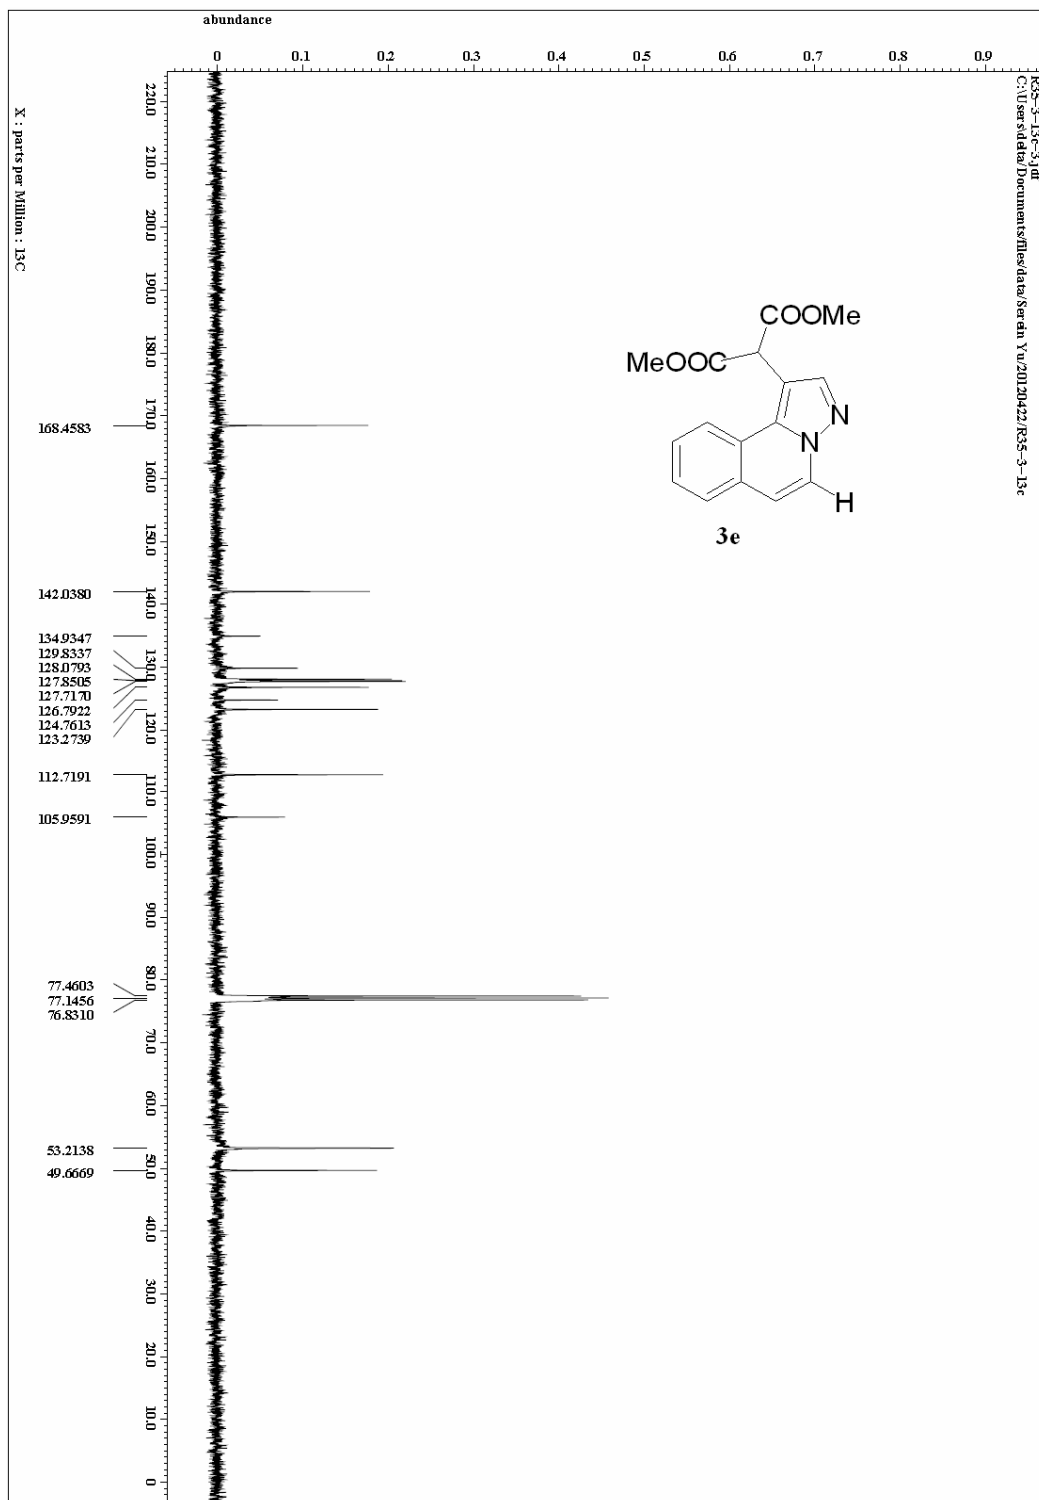

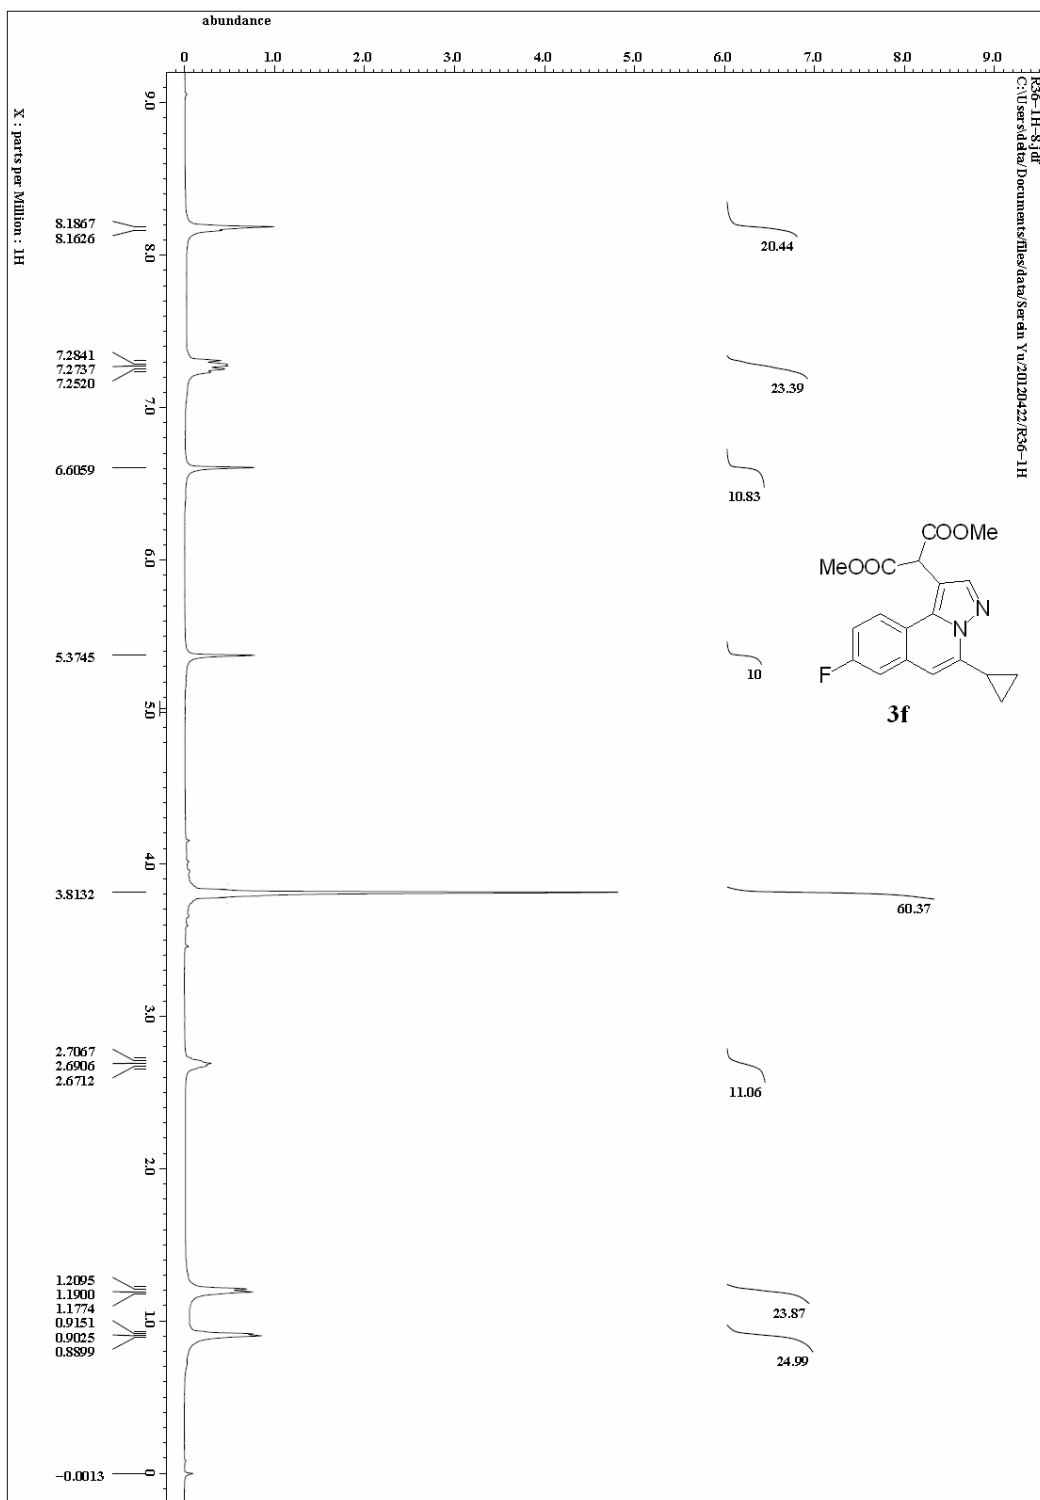

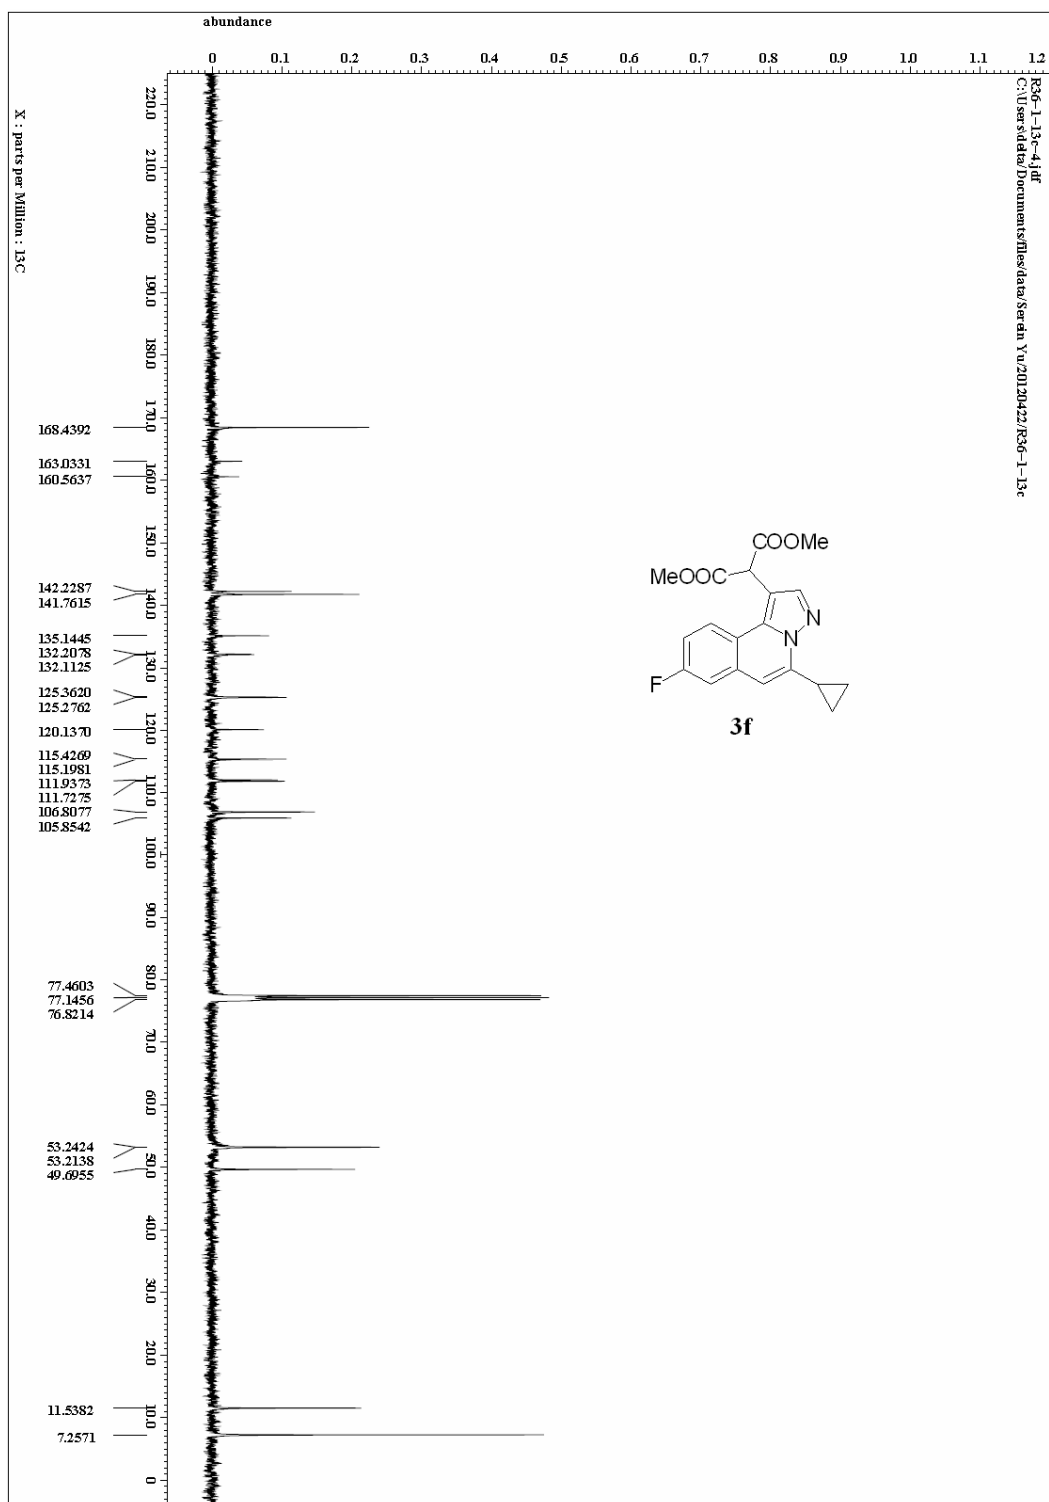

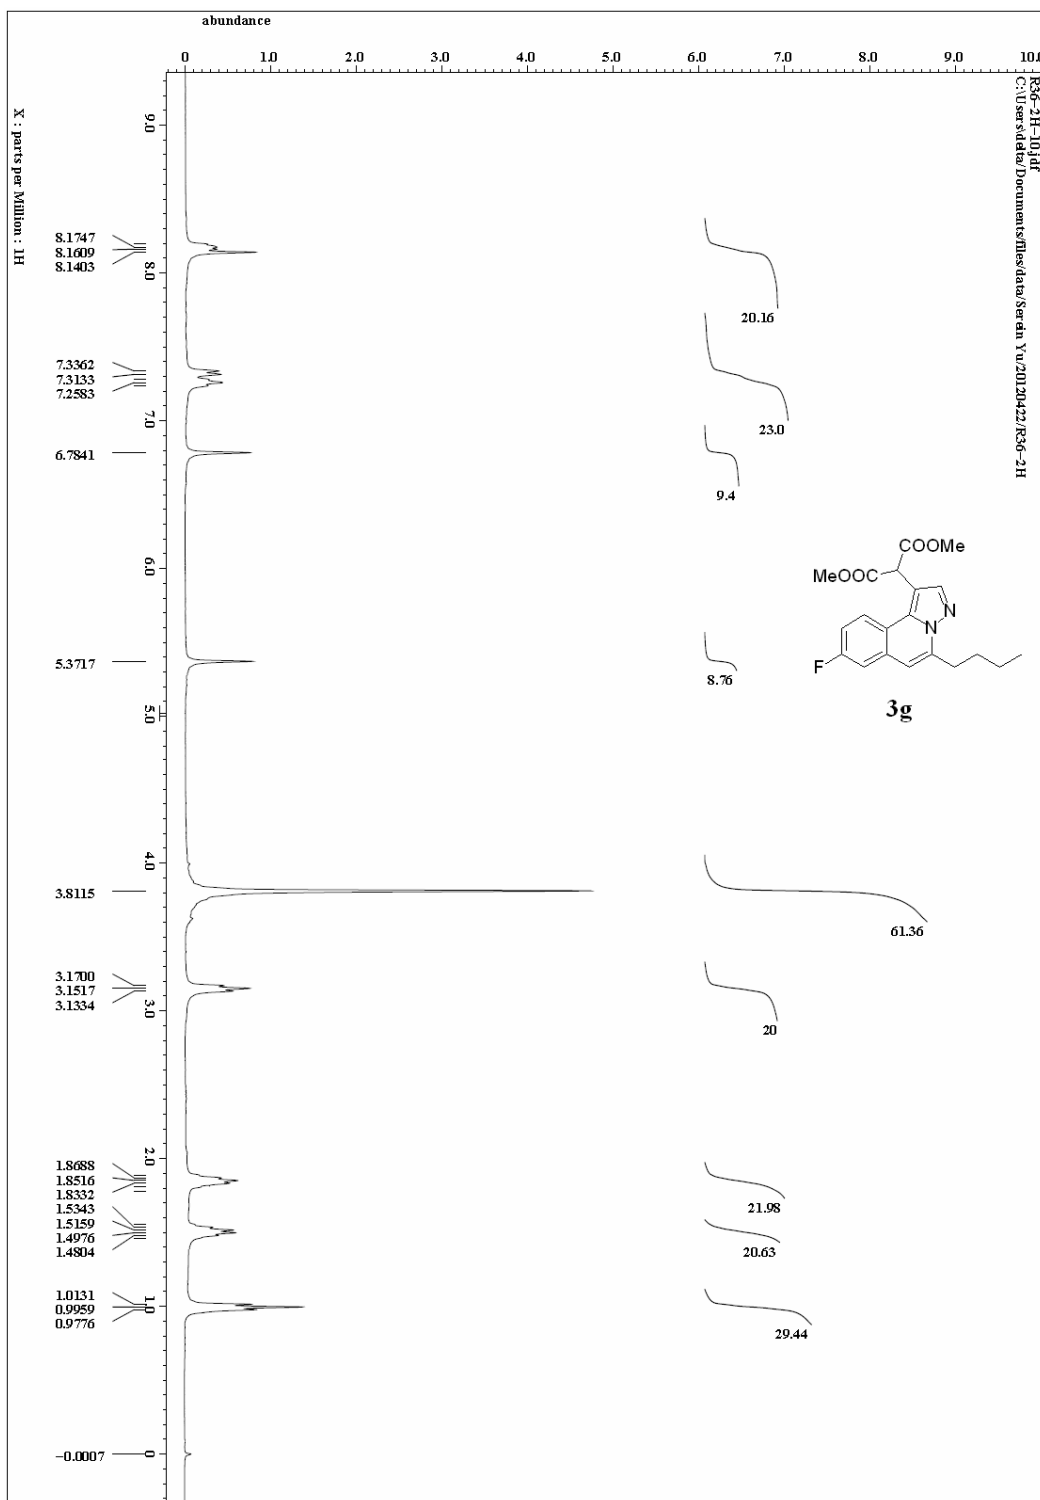

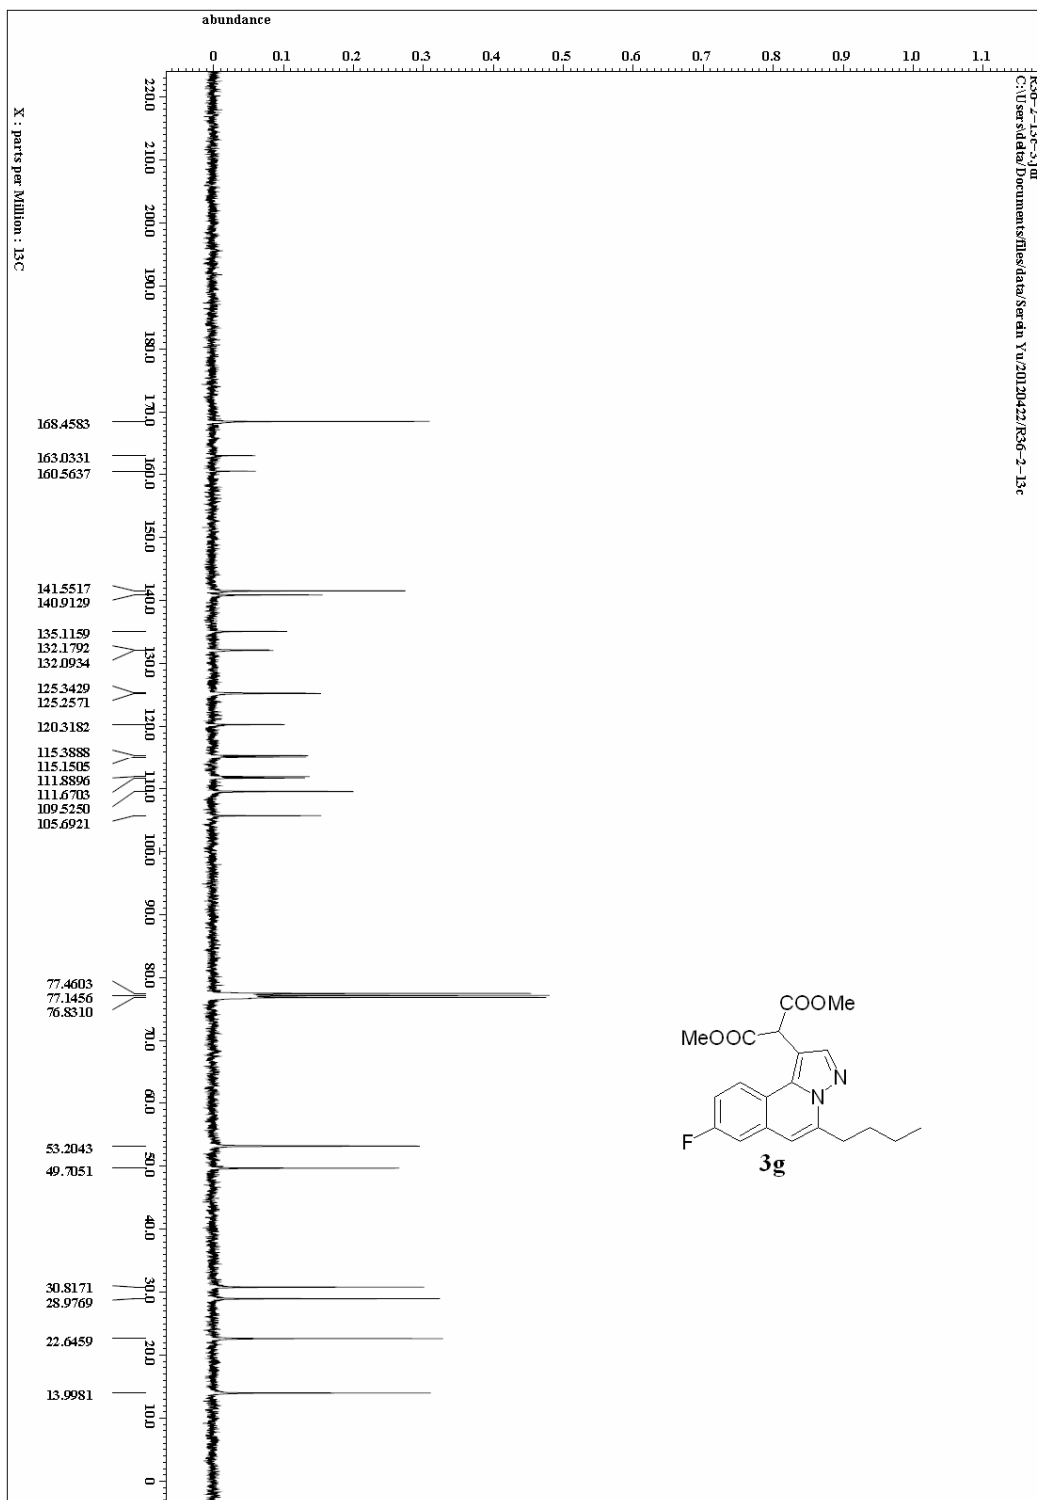

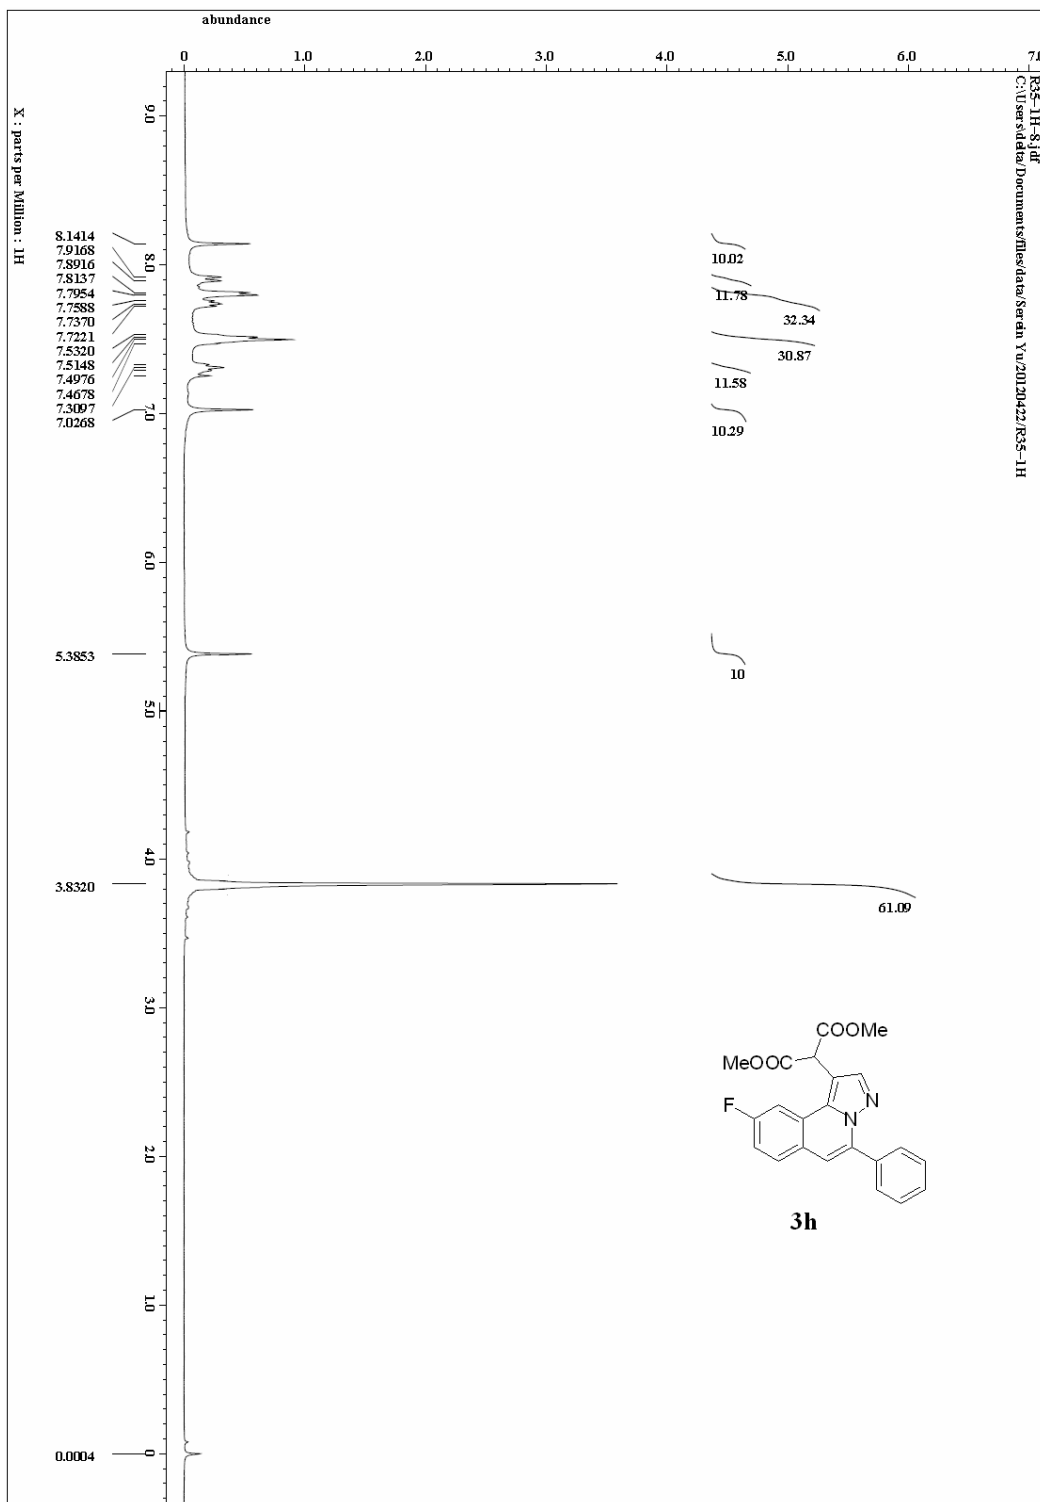

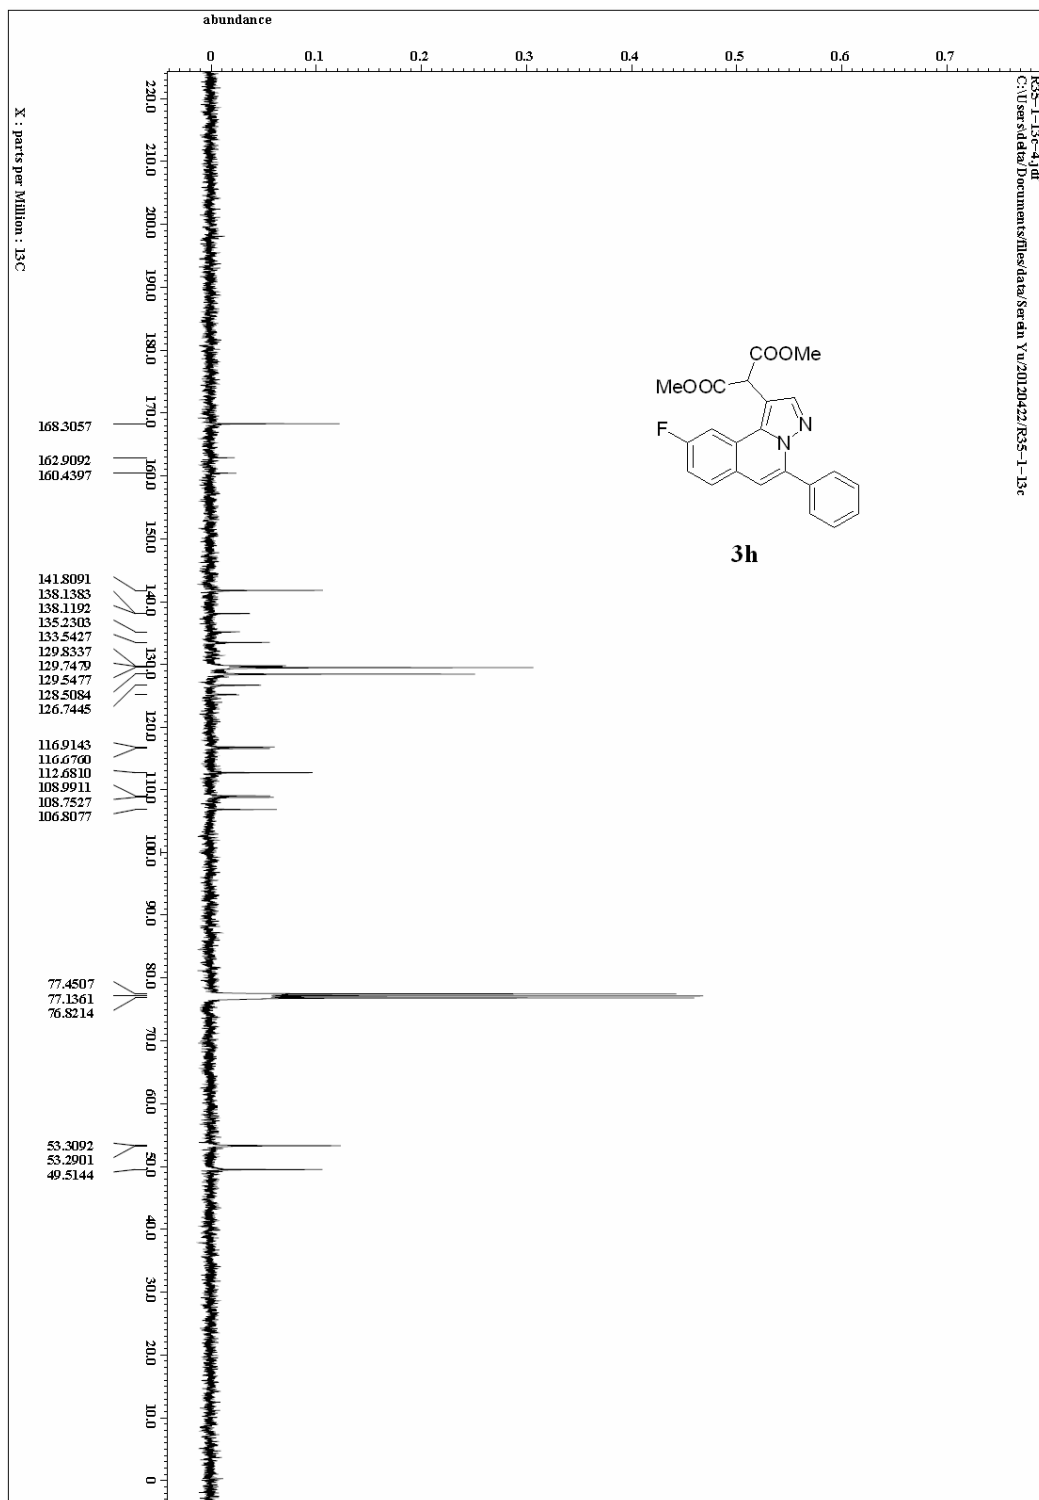

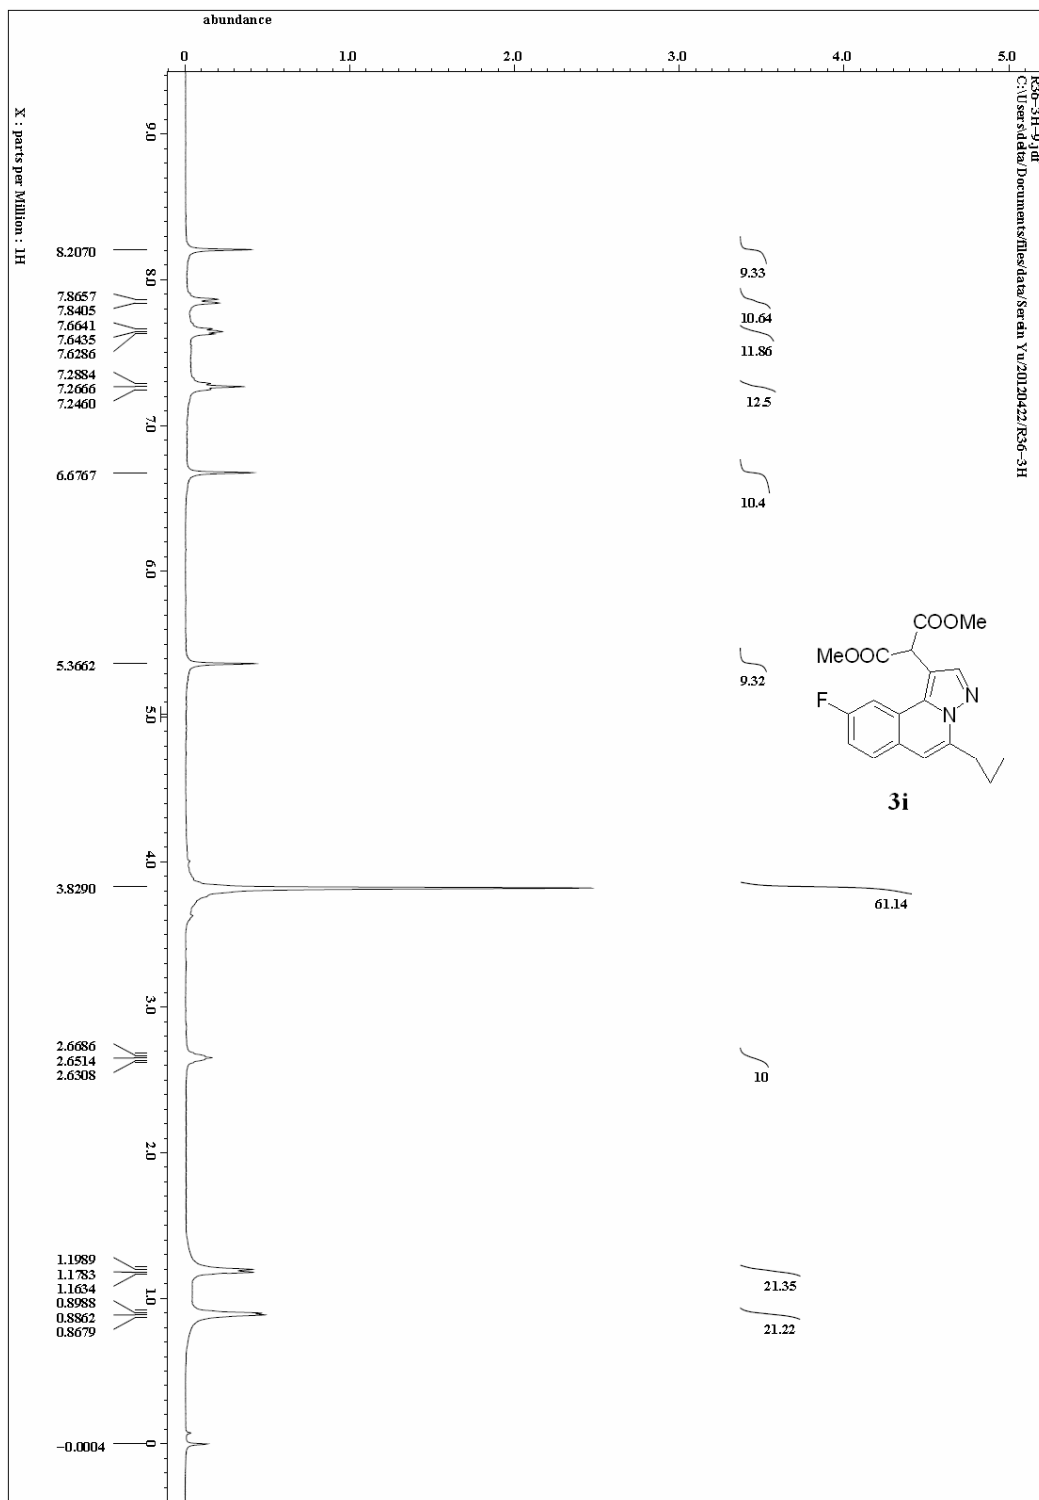



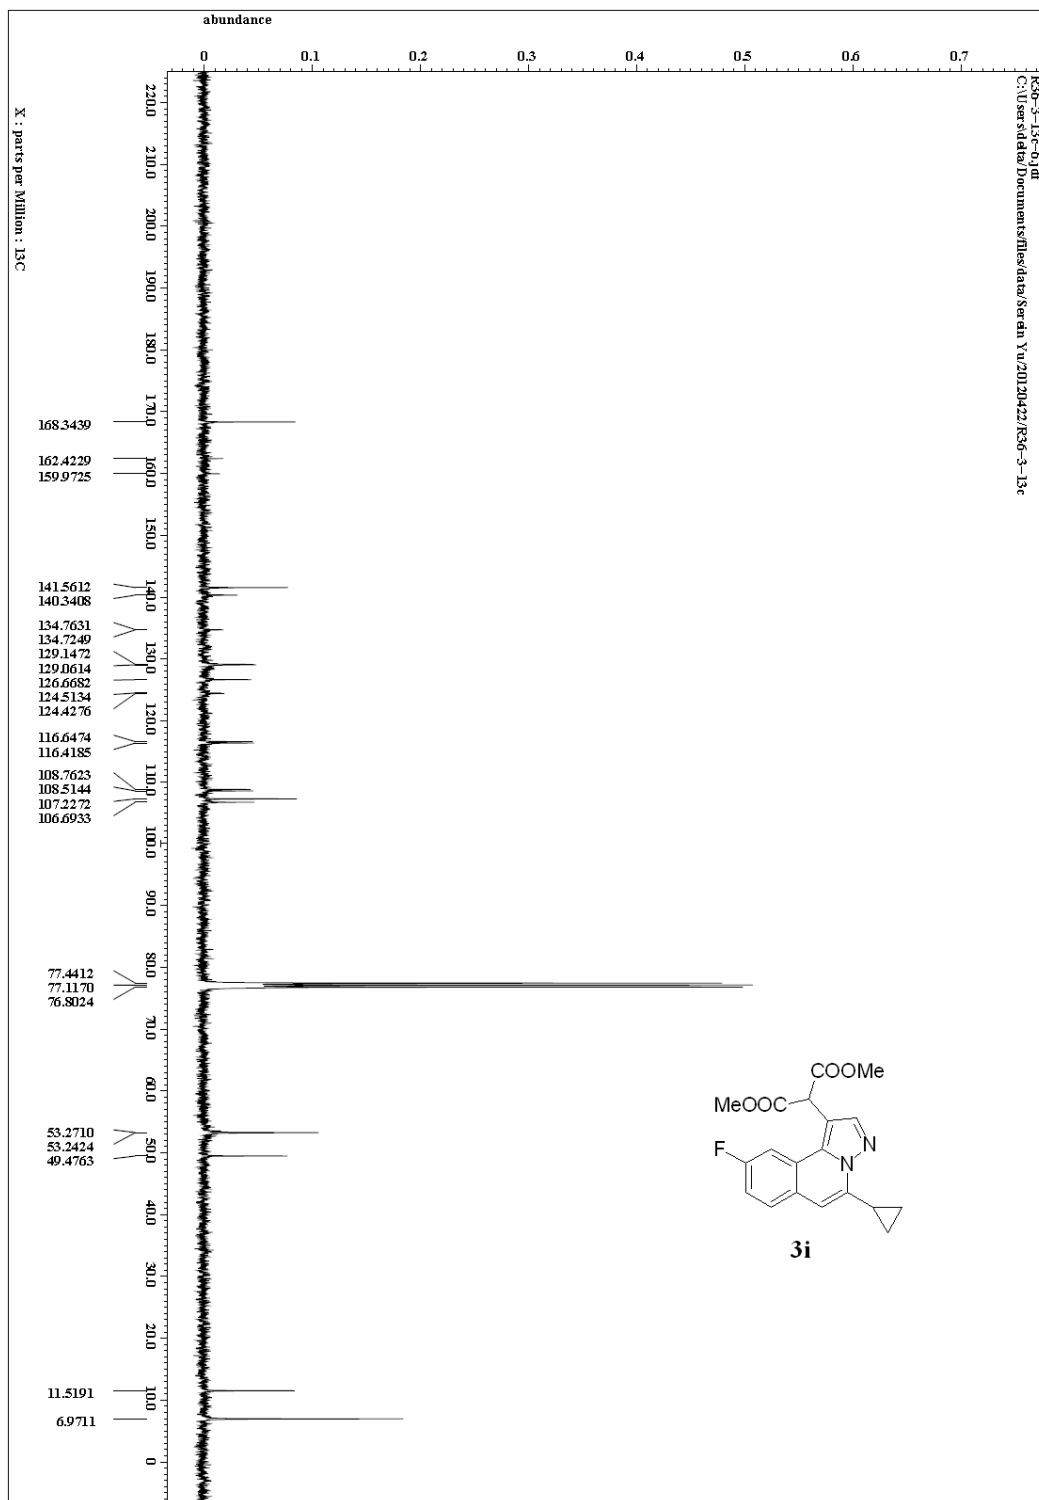

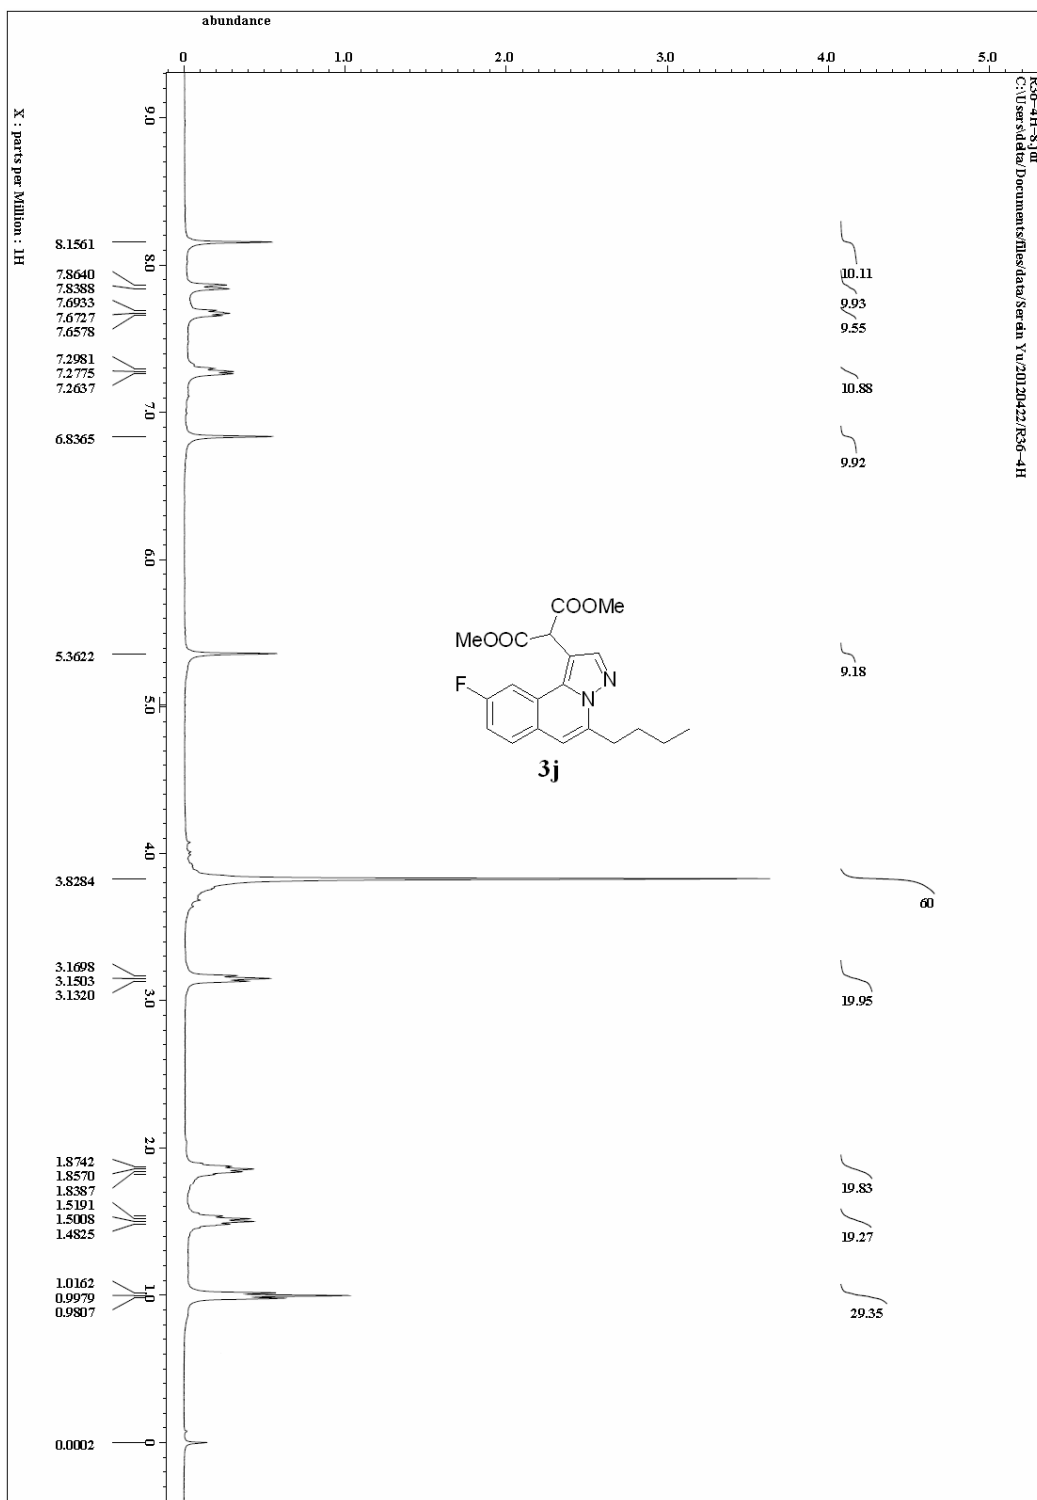

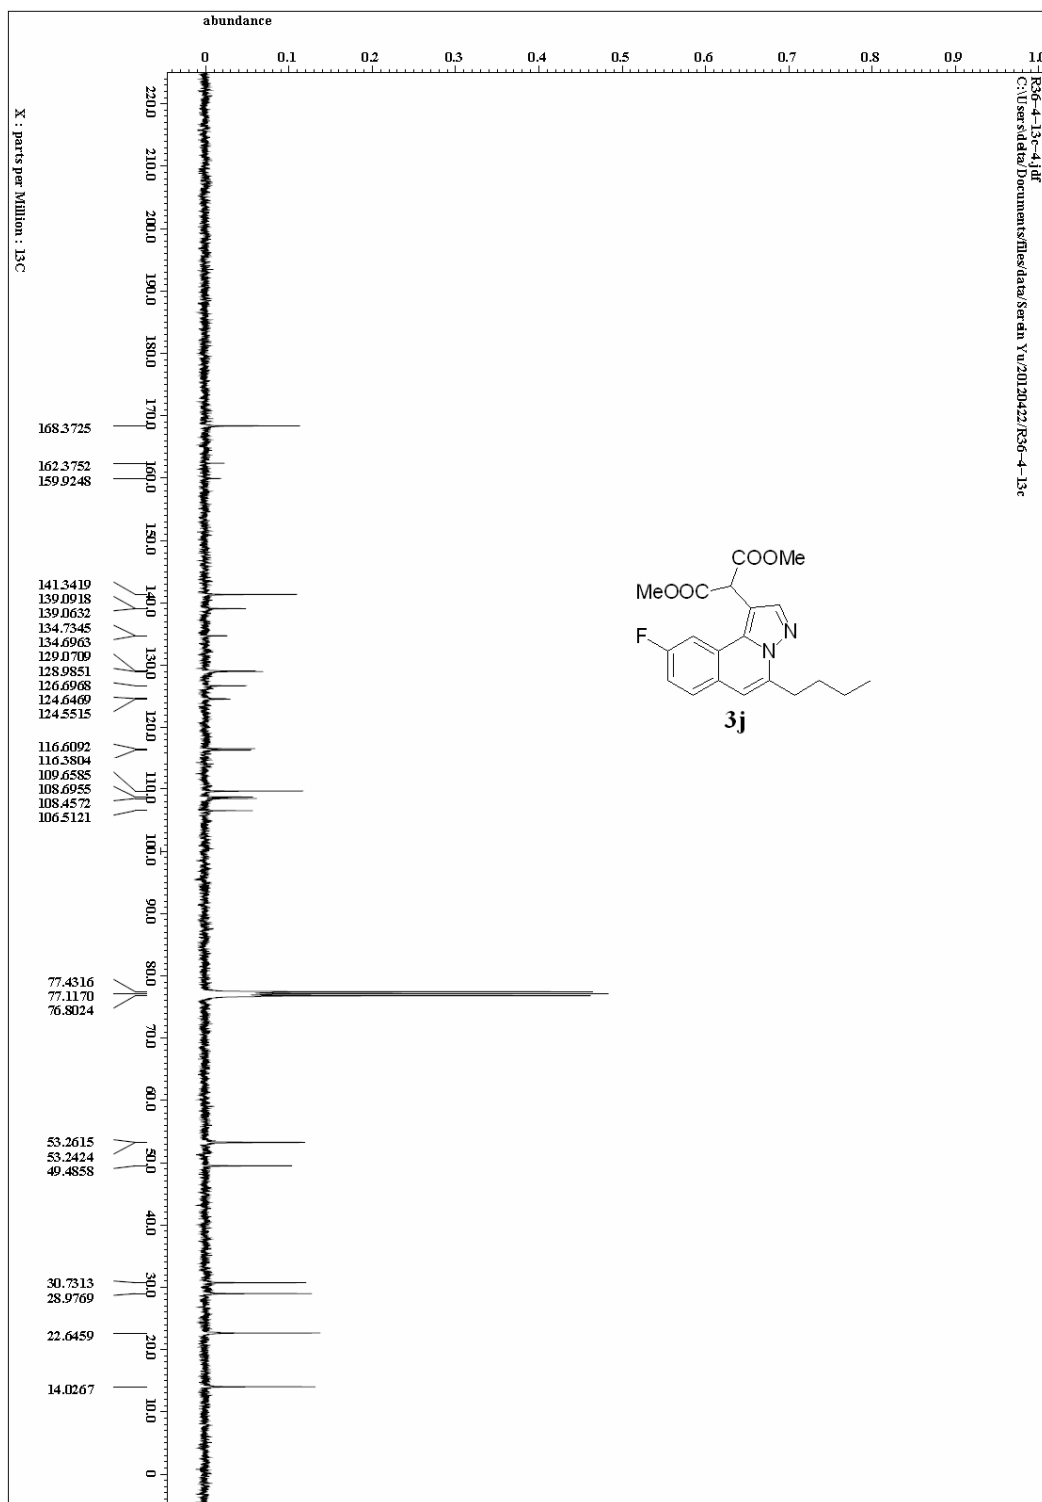

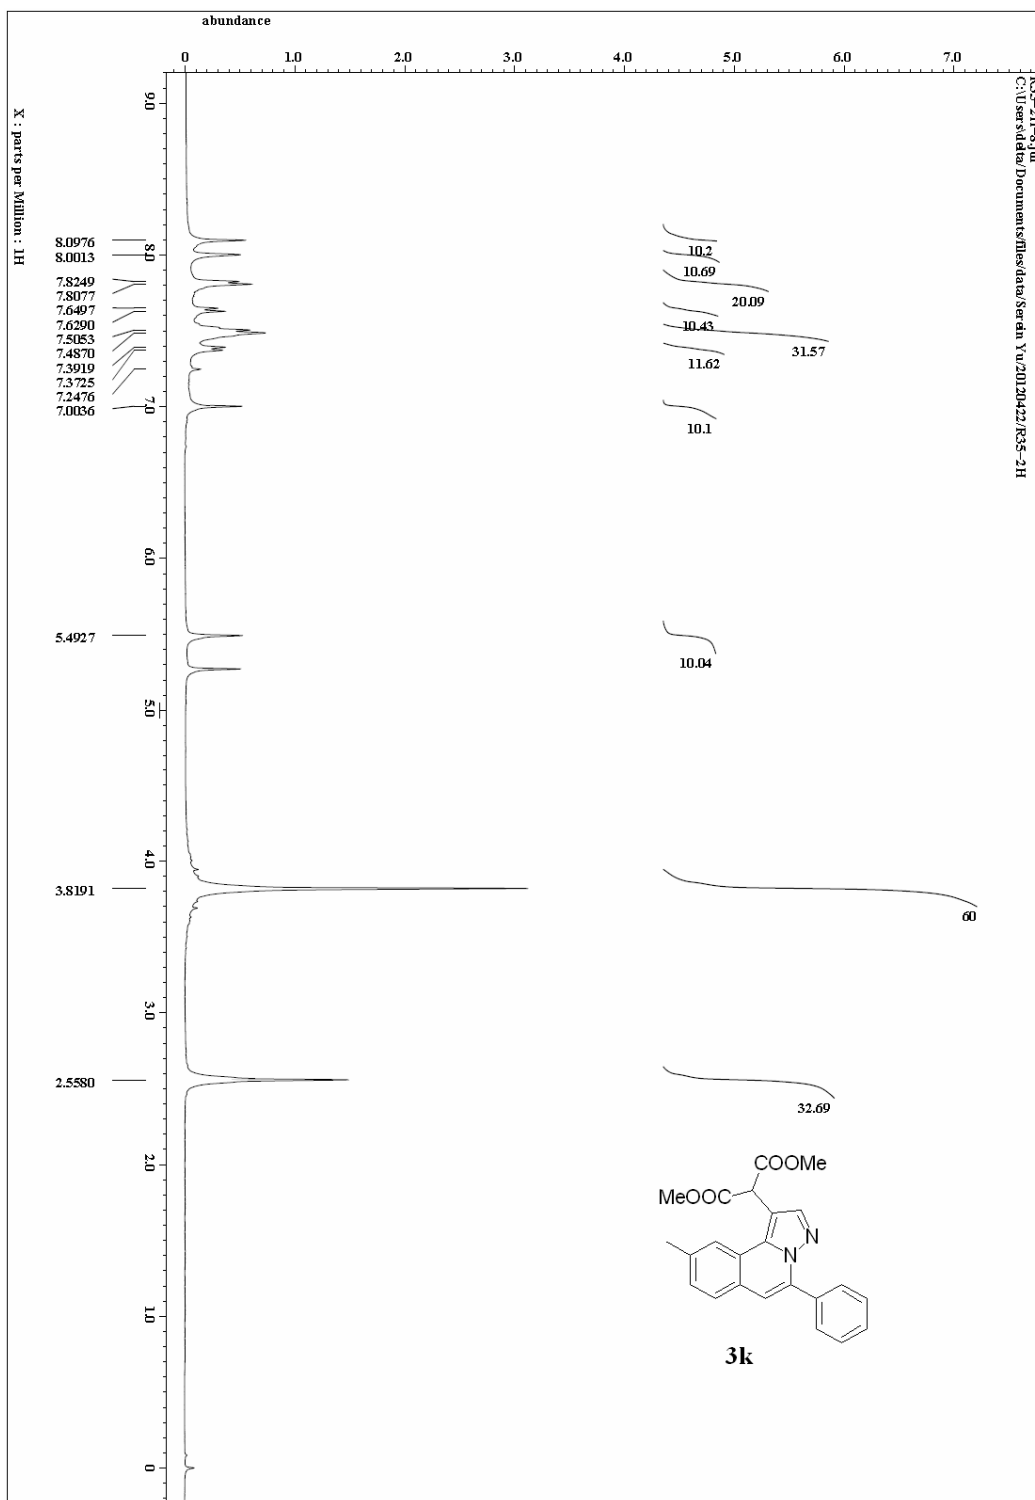

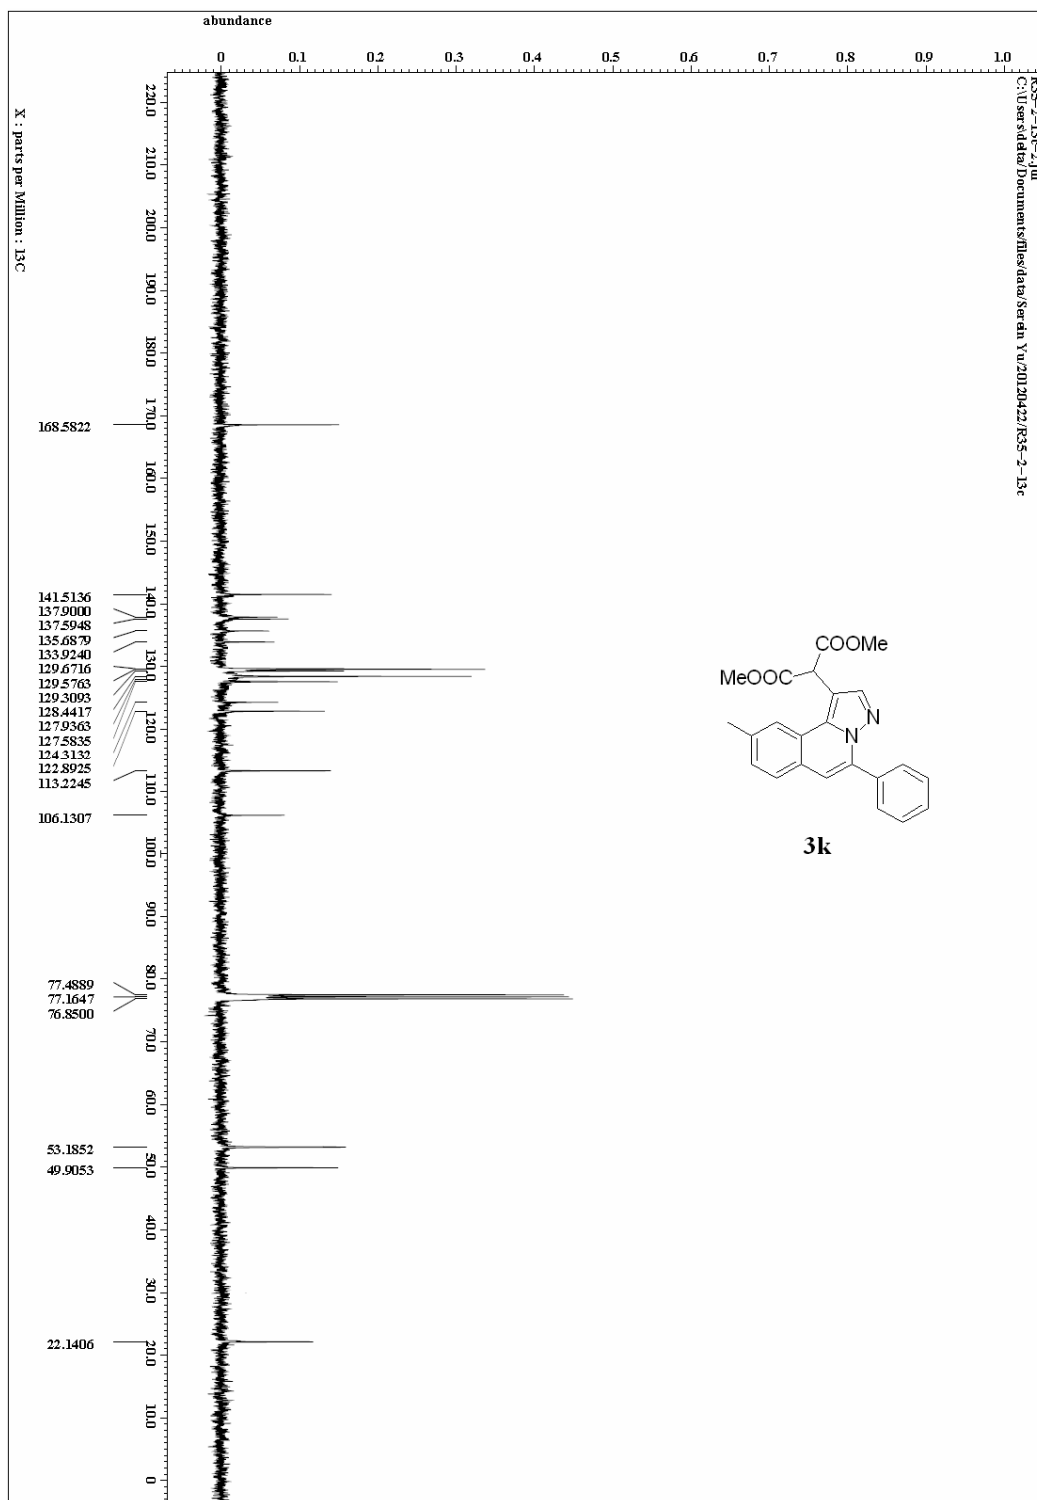

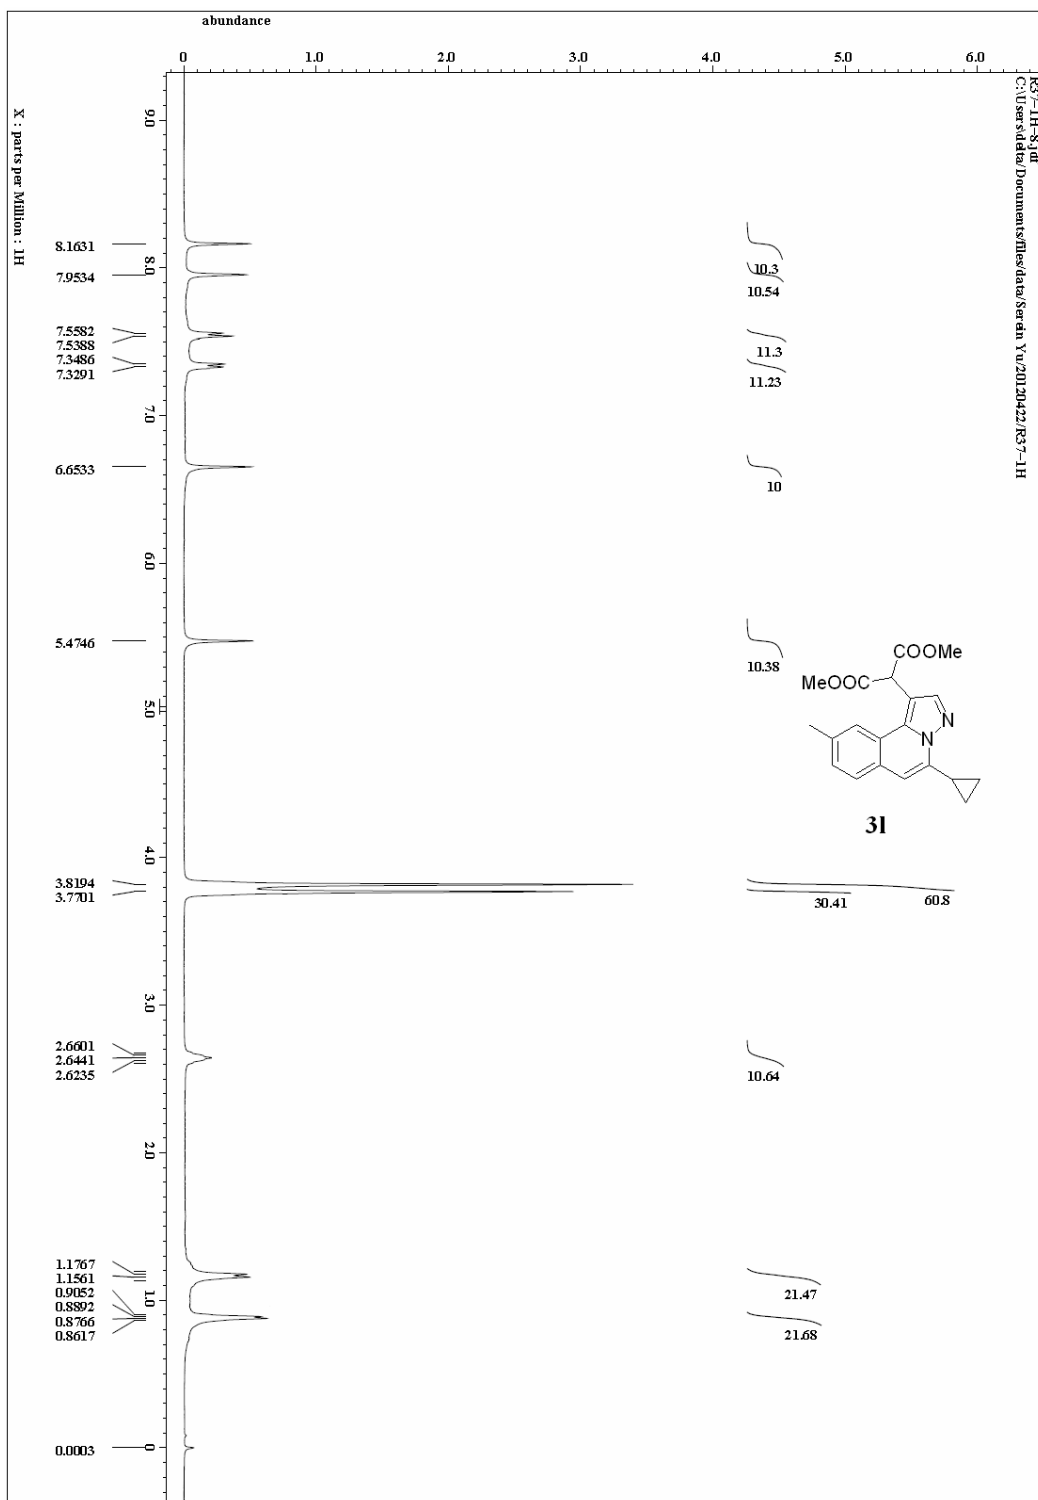

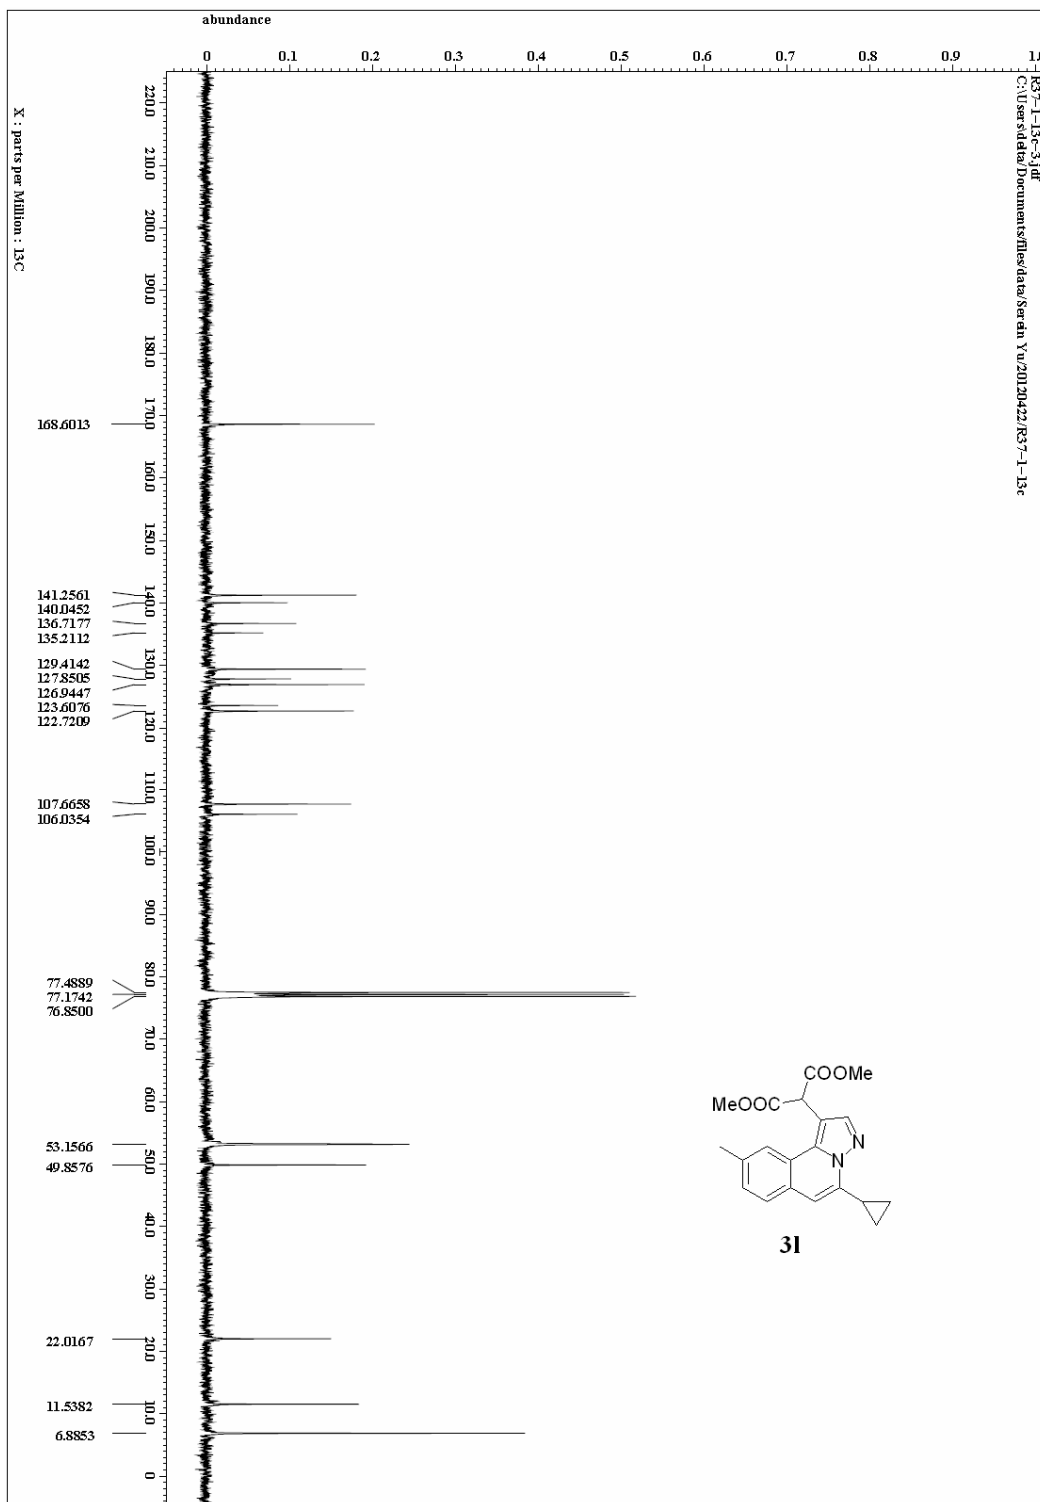

Supplement: c2ob26824h.pdf [file c2ob26824h.pdf]
